# Supplementary material for: Profile of Risk Factors for Non-Communicable Diseases in Punjab, Northern India: Results of a State-Wide STEPS Survey
Source: PLoS One. 2016 Jul 7;11(7):e0157705. doi: 10.1371/journal.pone.0157705 (PMC4936739; doi:10.1371/journal.pone.0157705)
Supplement: S1 Dataset — (XLSX) [file pone.0157705.s001.xlsx]

## Sheet: MasterDataSet
C4	C9	C5	I1	C10	I6	C6	C7	C8	T1	T2	T3	T4a	T4b	T4c	T5a	T5aw	T5b	T5bw	T5c	T5cw	T5d	T5dw	T5e	T10	T5ew	T5f	T11a	T5fw	T11b	T5other	T11c	T6	T12	T7	T13	T8	T14a	T9	T14aw	T14b	T14bw	T14c	T14cw	T14d	T14dw	T14e	T14ew	T14other	A1
8	3	5	119	48000	3	1	5	6	2																								2			2													2
5	2	3	121	54000	3	1	2	6	2																								2			2													2
8	6	3	122	100000	3	3	1	3	2																								2			2													2
5	8	2	123	1200000	3	3	2	3	2																								2			2													1
0	6	1	124	200000	3	3	2	6	2																								2			2													2
10	4	5	125	120000	3	3	2	3	2																								2			2													1
0	4	1	126	50000	3	3	5	6	2																								2			2													2
0	2	1	127	72000	3	3	5	6	2																								2			2													2
0	2	1	128	60000	3	1	2	6	2																								2			2													2
0	4	1	129	84000	3	1	2	6	2																								2			2													2
0	2	1	130	72000	3	1	2	3	2																								2			2													2
0	3	1	131	60000	3	1	5	3	2																								1		1	2						4							1
0	2	1	132	48000	3	1	1	6	2																								2			2													2
0	3	1	133	60000	3	1	2	6	2																								2			2													2
0	2	1	134	60000	3	1	1	3	2																								2			2													2
0	6	1	135	72000	3	1	2	6	2																								2			2													2
8	2	3	136	168000	3	1	5	6	2																								2			2													2
6	4	3	137	24000	3	1	1	3	2																								2			2													2
0	3	1	138	36000	3	2	2	3	1	1	20						4															1	2	1															2
0	5	1	139	100000	3	1	5	6	2																								2			2													2
0	2	1	141	36000	3	2	2	6	2																								2			2													2
0	2	1	142	66000	3	1	2	2	2																								1		1	2	7												1
12	3	5	143	84000	3	3	2	6	2																								2			2													2
8	2	3	144	36000	3	3	2	2	2																								2			2													2
0	3	1	145	40000	3	3	2	6	2																								2			2													2
10	5	4	146	120000	3	3	2	3	2																								2			2													1
12	2	4	147	240000	3	3	2	6	2																								2			2													2
3	3	2	148	312000	3	3	2	6	2																								2			2													2
0	2	1	149	96000	3	3	2	6	2																								2			2													2
12	3	4	150	36000	3	3	1	5	2																								2			2													2
0	3	1	151	100000	3	3	2	3	2																								2			2													2
5	5	3	152	200000	3	3	2	6	2																								2			2													2
12	4	4	153	84000	3	3	1	6	2																								2			2													2
0	3	1	154	100000	3	3	2	3	2																								2			2													2
12	4	5	201	500000	3	3	2	3	2																								2			2													2
3	3	2	202	72000	3	3	5	6	2																								2			2													2
5	6	3	203	600000	3	3	2	6	2																								2			2													2
12	2	5	204	300000	3	3	2	6	2																								2			2													2
5	3	3	205	108000	3	1	2	6	2																								2			2													2
8	4	4	206	720000	3	1	2	6	2																								2			2													2
8	4	3	207	120000	3	1	2	6	2																								2			2													2
2	4	2	208	84000	3	1	2	2	1	1	77	25					2															1	2	2															1
0	4	1	209	60000	3	1	2	9	2																								2			2													1
10	3	3	210	60000	3	1	2	6	2																								2			2													2
0	4	1	211	84000	3	1	2	6	2																								2			2													2
6	5	3	212	88	3	1	1	2	2																								2			2													1
8	3	4	213	96000	3	3	1	6	2																								2			2													2
10	2	4	214	360000	3	1	2	6	2																								2			2													2
10	2	4	215	72000	3	1	2	2	2																								2			2													2
0	3	1	216	84000	3	1	2	6	2																								2			2													2
0	2	1	217	96000	3	1	2	6	2																								2			2													2
10	6	4	218	40000	3	3	2	3	2																								2			2													2
10	6	5	219	192000	3	1	2	2	2																								2			2													2
0	4	1	220	60000	3	1	2	2	2																								2			2													2
0	7	1	221	180000	3	3	2	3	2																								2			2													2
11	6	5	222	108000	3	3	1	5	2															15									2			2													2
0	5	1	223	192000	3	1	2	6	2																								2			2													2
0	6	1	224	150000	3	1	2	6	2																								2			2													2
0	3	1	225	60000	3	1	2	2	2																								2			2													2
12	6	4	226	144000	3	1	1	3	2																								2			2													2
0	3	1	227	24000	3	1	2	2	2																								2			2													1
10	5	5	228	88	3	1	4	6	2																								2			2													2
8	3	5	229	84000	3	1	2	6	2																								2			2													2
8	3	3	230	36000	3	3	2	2	2																								2			2													1
12	2	5	231	108000	3	1	2	6	2																								2			2													2
10	4	5	232	72000	3	1	4	2	2																								2			2													1
8	4	4	233	60000	3	1	2	6	2																								2			2													2
4	4	2	234	6000	3	1	2	2	2																								2			2													2
5	5	3	235	60000	3	1	2	3	2																								2			2													1
8	6	4	236	96000	3	1	2	6	2																								2			2													2
15	5	5	237	120000	3	1	1	7	2																								2			2													2
10	2	5	238	96000	3	1	2	2	2																								2			2													1
0	2	1	239	48000	3	1	2	6	2																								2			2													2
5	1	3	240	8400	3	1	5	8	2																								2			2													2
8	3	5	241	96000	3	1	2	3	2																								2			2													1
0	3	1	242	72000	3	1	5	6	2																								2			2													2
10	4	4	243	88	3	1	1	6	2																								2			2													2
0	3	1	244	72000	3	1	2	3	2																								2			2													2
0	3	1	245	72000	3	1	5	2	2																								2			2													2
8	3	3	246	120000	3	1	2	4	2																								2			2													2
14	2	5	247	240000	3	1	1	5	2																								2			2													2
0	3	1	248	72000	3	1	1	2	2																								2			2													2
6	6	3	249	120000	3	1	2	6	2																								2			2													2
5	4	3	250	72000	3	1	2	3	2																								2			2													2
0	3	1	251	36000	3	1	5	6	2																								2			2													2
0	4	1	252	88	3	1	2	2	2																								2			2													2
0	7	1	253	96000	3	1	2	2	2																								2			2													1
8	5	2	254	60000	3	1	1	8	2																								2			2													2
12	4	5	301	120000	3	2	1	5	2																								2			2													2
10	6	5	302	200000	3	2	2	6	2																								2			2													2
10	2	5	303	60000	3	3	2	2	2																								2			2													2
9	2	3	304	36000	3	2	2	3	2																								1		1	2	15												1
0	2	1	305	48000	3	1	2	3	2																								2			2													2
4	2	2	306	30000	3	1	2	2	1	1	9						36															2	2	2															1
5	3	3	307	96000	3	1	2	2	2																								1		1	2	15												1
11	4	4	308	120000	3	1	2	7	1	1	35					2		2														2	1	2	1							5							2
15	6	6	309	144000	3	1	1	5	2																								2			2													2
8	4	3	310	96000	3	1	1	3	2																								2			2													2
6	1	3	311	72000	3	1	3	3	2																								2			2													1
7	3	3	312	60000	3	1	1	3	2																								2			2													2
7	6	3	313	132000	3	1	1	2	2																								2			2													2
8	3	5	314	42000	3	1	2	2	2																								2			2													1
7	4	3	315	132000	3	1	1	2	2																								2			2													2
0	3	1	316	60000	3	1	2	6	2																								2			2													2
10	2	5	317	93600	3	3	2	2	2																								2			2													2
0	5	1	318	60000	3	3	2	3	2																								2			2													2
5	2	3	319	36000	3	1	2	2	2																								2			2													2
6	5	2	320	60000	3	2	2	3	2																								2			2													2
0	3	1	321	120000	3	3	2	2	2																								2			2													1
10	4	5	322	95000	3	2	2	2	2																								2			2													1
12	6	5	323	650000	3	3	1	2	2																								2			2													1
9	3	5	324	72000	3	1	2	3	2																								2			2													1
8	4	4	325	36000	3	1	2	3	2																								2			2													1
0	3	1	326	24000	3	1	2	6	2																								2			2													2
5	3	3	327	78000	3	1	2	1	2																								2			2													2
8	4	3	328	180000	3	1	1	2	2																								2			2													2
8	6	3	329	180000	3	1	1	2	2																								2			2													2
4	5	2	330	72000	3	1	5	2	2																								2			2													1
0	3	1	331	72000	3	1	2	2	2																								2			2													2
12	6	4	333	120000	3	1	1	2	2																								2			2													2
10	2	4	334	60000	3	1	2	2	2																								2			2													1
12	4	5	335	96000	3	1	2	2	2																								2			2													2
6	2	3	336	60000	3	1	2	2	2																								2			2													1
12	4	4	337	96000	3	1	2	3	2																								2			2													2
0	2	1	338	84000	3	1	2	3	2																								1		1	2	15												1
12	4	5	339	144000	3	1	1	2	2																								2			2													2
10	2	5	340	108000	3	1	2	3	2																								2			2													1
0	4	1	341	48000	3	1	2	6	2																								2			2													2
15	5	4	342	50000	3	1	1	5	2																								2			2													2
5	3	3	343	72000	3	1	2	3	2																								2			2													2
12	2	5	344	200000	3	3	2	3	2																								2			2													2
11	5	5	345	200000	3	2	2	3	2																								2			2													2
14	6	6	346	200000	3	2	1	5	2																								2			2													2
15	4	6	347	200000	3	2	1	5	2																								2			2													2
5	2	3	348	120000	3	1	1	2	2																								2			2													2
10	7	4	349	120000	3	1	2	6	2																								2			2													2
12	6	5	350	200000	3	3	2	6	2																								2			2													2
12	5	4	351	10000	3	2	2	3	2																								2			2													2
0	3	1	352	120000	3	1	1	2	2																								2			2													2
10	2	5	353	250000	3	2	5	6	2																								2			2													2
0	4	1	354	400000	3	2	2	8	2																								2			2													1
0	2	1	402	54000	3	1	2	2	2																								2			2													2
0	2	1	403	60000	3	1	2	2	2																								2			2													2
0	2	1	404	50000	3	3	2	2	2																								2			2													2
0	2	1	405	72000	3	3	2	2	2																								2			2													2
10	5	5	406	720000	3	1	1	8	2																								2			2													2
2	2	2	407	72000	3	1	2	2	2																								2			2													2
0	4	1	408	54000	3	1	2	2	2																								2			2													2
0	2	1	409	504000	3	1	2	3	2																								2			2													2
8	2	3	410	72000	3	1	2	2	2																								2			2													2
10	6	5	411	400000	3	1	2	3	2																								2			2													1
0	2	1	412	24000	3	1	2	3	2																								2			2													1
0	2	1	413	72000	3	1	2	2	2																								2			2													2
0	6	1	414	72000	3	1	1	2	2																								2			2													2
0	2	1	415	72000	3	3	2	6	2																								2			2													2
5	5	3	416	240000	3	1	2	3	2																								2			2													2
5	3	2	417	72000	3	1	5	1	2																								2			2													2
0	3	1	418	96000	3	2	5	3	2																								2			2													1
0	1	1	419	48000	3	1	3	2	1	1	14				10																	2	2	2															1
0	2	1	420	96000	3	2	2	3	1	1	77	15					2															2	1	2	1		4												1
0	2	1	421	120000	3	1	2	6	2																								2			2													2
0	2	1	422	36000	3	2	2	3	2																								2			2													1
5	2	3	423	48000	3	1	2	6	2																								2			2													2
0	2	1	424	48000	3	1	5	9	2																								1		1	2	4												1
0	2	1	425	88	3	1	2	6	2																								2			2													2
5	2	3	426	72000	3	1	2	2	2																								1		1	2	1												2
0	4	1	427	60000	3	1	2	2	2																								2			2													2
5	2	3	428	72000	3	1	2	2	2																								2			2													1
0	2	1	429	72000	3	1	2	6	2																								2			2													2
0	3	1	430	60000	3	1	2	6	2																								2			2													2
7	6	3	431	84000	3	1	2	2	2																								2			2													1
10	3	5	432	72000	3	1	1	5	2																								2			2													2
0	2	1	433	72000	3	1	2	2	2																								2			2													2
0	7	1	434	60000	3	1	2	3	1	2	10																					2	2	2				2											1
0	4	1	435	72000	3	1	2	3	2																								2			2													2
10	2	5	436	60000	3	1	2	3	2																								2			2													2
0	5	1	437	180000	3	1	2	6	2																								2			2													2
0	2	1	438	72000	3	1	2	3	2																								2			2													2
0	2	1	439	72000	3	1	2	3	2																								2			2													2
0	3	1	440	48000	3	1	2	6	2																								2			2													2
0	2	1	441	60000	3	1	2	6	2																								2			2													2
0	2	1	442	60000	3	1	2	3	2																								2			2													2
0	2	1	443	60000	3	1	2	6	2																								2			2													2
0	2	1	444	72000	3	1	2	3	2																								2			2													2
0	2	1	445	36000	3	1	2	3	2																								2			2													2
0	3	1	446	36000	3	88	2	3	2																								2			2													2
5	4	3	448	240000	3	3	2	1	2																								2			2													1
12	2	4	449	420000	3	3	2	6	2																								2			2													2
5	4	3	450	5000	3	3	2	6	2																								2			2													2
10	7	5	451	84000	3	3	1	2	2																								2			2													2
9	2	3	452	600000	3	3	2	3	2																								2			2													2
5	2	3	453	88	3	3	2	6	2																								2			2													2
5	4	3	454	120000	3	1	2	2	2																								2			2													1
10	3	5	501	50000	3	3	2	3	2																								2			2													2
0	4	1	502	120000	3	3	2	6	2																								2			2													2
15	4	7	503	100000	3	3	2	6	2																								2			2													2
14	5	6	504	60000	3	3	2	6	2																								2			2													2
8	6	4	505	64000	3	3	2	2	2																								2			2													1
0	4	1	506	84000	3	1	2	6	2																								2			2													2
5	5	3	507	180000	3	1	1	2	2																								2			2													2
8	5	4	508	100000	3	1	1	6	2																								2			2													2
0	2	1	509	100000	3	1	2	6	2																								2			2													2
8	2	4	510	72000	3	2	2	3	2																								2			2													1
12	4	4	511	30000	3	1	1	3	2																								2			2													2
10	3	4	512	60000	3	1	2	3	2																								2			2													2
5	2	3	513	36000	3	1	2	6	2																								2			2													2
0	4	1	514	50000	3	1	2	8	1	1	50						2															1	2	1															1
2	2	1	515	24000	3	1	5	3	2																								2			2													2
0	5	1	516	84000	3	1	2	3	2																								2			2													2
0	6	1	517	60000	3	1	2	2	1	1	16						2															1	2	2															1
0	2	1	518	36000	3	1	2	3	2																								2			2													2
0	2	1	519	600000	3	1	2	6	2																								2			2													2
0	5	1	520	36000	3	1	2	3	2																								2			2													1
0	2	1	521	36000	3	1	2	6	2																								2			2													2
0	2	1	522	24000	3	1	2	3	2																								2			2													2
5	2	3	523	72000	3	1	2	6	2																								2			2													2
0	2	1	524	60000	3	1	2	3	1	1	15						16															1	1	2	1							4							1
0	6	1	525	600000	3	1	2	6	2																								2			2													2
0	7	1	526	96000	3	1	1	3	1	1	77	1			4		2															1	2	1															1
12	2	5	527	72000	3	1	2	6	2																								2			2													2
0	2	1	528	72000	3	1	2	2	1	1	19				7777	7777	6															1	2	1															1
0	5	1	529	180000	3	1	2	2	2																								2			2													2
5	2	3	530	36000	3	1	1	2	2																								2			2													2
15	4	6	531	200000	3	1	1	3	2																								2			2													2
0	5	1	532	48000	3	1	5	1	2																								2			2													2
0	2	1	533	36000	3	1	2	6	2																								2			2													2
12	2	5	534	60000	3	88	2	2	1	1	15						7															1	2	2															1
0	3	1	535	60000	3	1	2	6	2																								2			2													2
0	5	1	536	96000	3	1	2	2	2																								2			2													2
0	6	1	537	72000	3	1	2	2	2																								2			2													2
0	2	1	538	96000	3	1	2	3	2																								2			2													2
4	2	2	539	72000	3	1	2	3	2																								2			2													2
0	4	1	540	72000	3	1	2	8	2																								2			2													1
0	4	1	541	72000	3	1	1	3	1	1	17						12															1	2	1															2
0	2	1	542	96000	3	1	5	3	2																								2			2													1
0	3	1	543	108000	3	1	5	6	2																								2			2													2
0	3	1	544	96000	3	3	2	3	2																								2			2													1
0	2	1	545	72000	3	1	2	6	2																								2			2													2
0	4	1	546	72000	3	3	5	6	2																								2			2													2
0	2	1	547	15000	3	3	2	6	2																								2			2													2
10	2	5	548	60000	3	1	2	3	2																								2			2													2
9	5	3	549	72000	3	1	1	6	2																								2			2													2
12	10	5	550	400000	3	3	2	6	2																								2			2													2
5	2	3	551	100000	3	3	2	6	2																								2			2													2
8	4	3	552	200000	3	3	2	6	2																								2			2													2
0	3	1	553	72000	3	1	2	6	2																								2			2													2
10	4	4	554	144000	3	3	2	7	2																								2			2													2
8	2	3	601	84000	3	1	2	6	2																								2			2													2
8	4	3	602	84000	3	1	2	6	2																								2			2													2
8	4	3	603	60000	3	1	2	6	2																								2			2													2
6	5	3	604	72000	3	1	2	2	1	1	15						20															1	2	2															1
0	3	1	605	84000	3	1	5	2	2																								2			2													2
0	5	1	606	120000	3	1	2	3	2																								2			2													1
0	2	1	607	88	3	1	2	6	2																								2			2													2
13	2	5	608	60000	3	1	2	3	2																								2			2													1
5	3	3	609	60000	3	1	1	6	2																								2			2													2
0	3	1	610	96000	3	1	2	2	2																								2			2													2
0	3	1	611	72000	3	1	5	6	2																								2			2													2
12	6	5	612	192000	3	1	2	2	2															77			77		77		77		2			1		2											1
0	3	1	613	102000	3	1	2	2	2																								2			2													2
0	4	1	614	72000	3	1	2	3	2																								1		2	2							3						1
0	2	1	615	120000	3	1	2	2	2																								2			2													2
0	4	1	616	192000	3	1	5	1	2																								2			2													2
0	2	1	617	36000	3	1	2	9	2																								2			2													2
7	4	3	618	88	3	2	2	3	2																								2			2													1
5	2	2	619	24000	3	1	2	2	2																								2			2													2
10	2	5	620	60000	3	1	2	6	2																								2			2													2
0	2	1	621	36000	3	1	2	6	2																								2			2													2
0	2	1	622	72000	3	1	2	3	2																								2			2													2
5	2	3	623	88	3	1	2	6	2																								2			2													2
10	3	5	624	120000	3	1	1	3	2																								2			2													2
0	3	1	625	72000	3	1	2	6	2																								2			2													2
0	2	1	626	60000	3	1	2	3	2																								2			2													1
0	2	1	627	72000	3	1	2	2	2																								2			2													2
8	4	3	628	96000	3	1	2	3	2																								2			2													1
5	4	3	629	60000	3	2	2	2	2																								2			2													2
10	3	5	630	120000	3	2	2	2	2																								2			2													2
8	6	3	631	120000	3	2	2	3	2																								2			2													1
5	4	3	632	48000	3	1	2	2	2																								2			2													1
5	4	5	633	88	3	3	2	6	2																								2			2													2
5	6	3	634	450000	3	2	2	6	2																								2			2													2
10	2	4	635	420000	3	2	2	6	2																								2			2													2
18	6	7	636	88	3	3	2	8	2																								2			2													2
12	3	4	637	180000	3	3	2	6	2																								2			2													2
17	3	7	638	100000	3	2	1	2	2																								2			2													2
10	3	5	639	600000	3	2	2	6	2																								2			2													2
10	2	4	640	108000	3	2	2	3	2																								2			2													1
7	2	3	641	120000	3	3	2	6	2																								2			2													2
0	5	1	642	88	3	3	2	6	2																								2			2													2
10	4	4	643	96000	3	2	2	6	2																								2			2													2
12	4	4	645	60000	3	2	2	2	2																								2			2													2
8	4	3	646	72000	3	2	2	6	2																								2			2													2
12	5	5	647	84000	3	2	1	8	2																								2			2													1
0	2	1	648	72000	3	3	2	3	2																								2			2													2
12	6	5	649	85000	3	2	1	5	2																								2			2													2
8	3	3	650	120000	3	2	2	6	2																								2			2													2
15	2	6	651	120000	3	3	2	3	2																								2			2													2
12	8	4	652	100000	3	2	1	5	2																								2			2													2
10	5	5	653	60000	3	2	2	6	2																								2			2													2
10	5	5	654	48000	3	2	2	6	2																								2			2													2
10	5	4	701	120000	3	1	2	3	2																								2			2													1
12	2	4	702	100000	3	1	2	2	2																								2			2													1
11	4	5	703	300000	3	2	1	5	2																								2			2													1
0	2	1	704	60000	3	2	2	6	2																								2			2													2
12	5	5	705	300000	3	2	1	8	2																								2			2													2
5	3	3	706	1500000	3	1	2	6	2																								2			2													2
10	4	5	707	100000	3	2	2	6	2																								2			2													2
0	3	1	708	100000	3	2	2	6	2																								2			2													2
0	2	1	709	100000	3	2	2	6	2																								2			2													2
5	4	3	710	50000	3	1	5	2	2																								1		1	2	4												1
10	3	4	711	100000	3	3	2	6	2																								2			2													2
10	4	5	712	360000	3	1	2	6	2																								2			2													2
0	2	1	713	180000	3	1	2	6	2																								2			2													2
10	3	4	714	144000	3	3	2	2	2																								2			2													1
5	6	2	715	108000	3	1	2	3	2																								1		1	2	3												1
10	4	4	716	80000	3	2	2	2	2																								2			2													2
10	4	4	717	60000	3	2	1	6	2																								2			2													2
8	2	3	718	72000	3	1	2	2	2																								1		1	2	1												1
5	5	3	719	144000	3	2	2	6	2																								2			2													2
8	3	3	720	120000	3	2	2	6	2																								2			2													2
0	2	1	721	60000	3	2	2	6	2																								2			2													2
6	4	3	722	100000	3	2	2	6	2																								2			2													2
7	4	3	723	80000	3	2	2	6	2																								2			2													2
10	3	5	724	120000	3	2	2	2	2																								2			2													1
5	4	3	725	60000	3	2	1	2	2																								2			2													2
17	3	7	726	88	3	2	2	6	2																								2			2													2
10	2	4	727	15000	3	3	1	8	2																								2			2													2
8	4	3	728	120000	3	3	2	6	2																								2			2													2
10	2	5	729	100000	3	3	2	3	2																								2			2													2
10	3	4	730	72000	3	3	1	6	2																								2			2													2
8	6	4	731	60000	3	2	2	3	2																								2			2													1
10	2	5	732	72000	3	3	2	2	2																								2			2													2
5	4	3	733	204000	3	2	2	6	2																								2			2													2
5	6	2	734	100000	3	2	2	6	2																								2			2													2
13	6	5	735	0	3	2	2	6	2																								2			2													2
0	4	1	736	120000	3	88	2	6	2																								2			2													2
10	6	4	737	500000	3	2	2	6	2																								2			2													2
10	3	4	738	120000	3	2	2	6	2																								2			2													2
14	4	6	739	72000	3	2	1	5	2																								2			2													2
10	5	4	740	48000	3	2	2	2	2																								2			2													1
0	5	1	741	150000	3	2	2	6	2																								2			2													2
10	2	4	742	30000	3	2	2	3	2																								2			2													2
10	3	4	743	54000	3	2	2	6	2																								2			2													2
0	4	1	744	36000	3	2	2	9	2																								2			2													1
10	3	5	745	100000	3	3	2	6	2																								2			2													2
8	3	3	746	120000	3	2	2	3	2																								2			2													2
10	1	4	747	400000	3	3	5	2	2																								2			2													1
0	4	1	748	50000	3	2	2	3	2																								2			2													1
12	3	5	749	100000	3	3	2	6	2																								2			2													2
12	4	5	750	5000	3	2	2	6	2																								2			2													2
12	3	5	751	100000	3	3	2	3	2																								2			2													2
5	4	2	752	144000	3	3	2	6	2																								2			2													2
5	3	3	753	100000	3	1	2	6	2																								2			2													2
5	2	2	754	24000	3	2	2	2	2																								1		1	2						2							1
12	2	5	801	120000	3	2	2	6	2																								2			2													2
5	5	3	802	88	3	1	2	6	2																								2			2													2
15	3	6	803	120000	3	2	1	5	2																								2			2													2
10	5	5	804	88	3	3	2	6	2																								2			2													2
8	2	5	805	180000	3	3	2	6	2																								2			2													2
0	4	1	806	60000	3	3	2	6	2																								2			2													2
12	2	4	807	120000	3	3	2	6	2																								2			2													2
0	4	1	808	108000	3	1	2	9	1	1	55						2															1	2	2															1
10	5	5	809	180000	3	3	2	6	2																								2			2													2
0	5	1	810	88	3	3	2	3	2																								2			2													2
10	2	5	811	36000	3	2	2	6	2																								2			2													2
10	5	5	812	108000	3	1	1	2	2																								2			2													2
5	4	3	813	204000	3	3	2	6	2																								2			2													2
0	2	1	814	24000	3	1	2	6	2																								2			2													2
0	6	1	815	100000	3	1	2	6	2																								2			2													2
12	2	5	816	100000	3	3	2	3	1	1	46				3																	1	2	1															2
0	2	1	817	96000	3	1	2	6	2																								2			2													2
8	4	3	818	48000	3	1	5	2	2																								2			2													2
0	2	1	819	108000	3	1	2	6	2																								2			2													2
8	2	3	820	80000	3	3	2	3	2															35									2			1		2											1
0	2	1	821	54000	3	1	2	6	2																								2			2													2
0	4	1	822	84000	3	1	2	6	2																								2			2													2
5	4	3	823	84000	3	1	2	6	2																								2			2													2
0	2	1	824	24000	3	2	2	2	2																								1		1	2	3												1
10	4	5	825	54000	3	1	2	6	2																								2			2													2
10	2	4	826	96000	3	1	2	2	2																								2			2													2
15	3	6	827	100000	3	1	1	3	2																								2			2													2
7	4	3	828	168000	3	2	2	2	2																								2			2													1
5	3	3	829	84000	3	2	2	6	2																								2			2													2
7	4	3	830	48000	3	2	2	2	2																								2			2													1
9	4	5	831	60000	3	1	2	2	2																								2			2													2
0	4	1	832	60000	3	2	2	6	2																								2			2													2
0	2	1	834	72000	3	2	2	6	2																								2			2													2
5	5	3	835	50000	3	3	2	2	2																								1		1	2	2												1
17	3	7	836	120000	3	2	2	2	2																								2			2													2
12	4	4	837	36000	3	3	2	2	2																								2			2													2
12	6	4	838	120000	3	2	2	1	2																								2			2													1
12	10	4	839	88	3	2	2	6	2																								2			2													2
10	3	5	840	216000	3	3	2	6	2																								2			2													2
12	4	5	841	120000	3	3	2	6	2																								2			2													2
0	4	1	842	60000	3	3	2	6	2																								2			2													2
8	9	5	843	500000	3	3	2	3	2																								2			2													2
4	1	1	844	180000	3	3	5	6	2																								2			2													2
10	5	5	845	120000	3	3	2	2	2																								2			2													2
16	3	7	846	70000	3	3	2	1	2																								2			2													2
20	2	7	847	120000	3	3	2	3	2																								2			2													2
5	4	3	848	84000	3	1	2	6	2																								2			2													2
0	1	1	849	24000	3	1	5	6	2																								2			2													2
0	3	1	850	54000	3	1	4	6	2																								2			2													2
8	5	3	851	10000	3	1	2	3	2																								2			2													1
6	2	5	852	6000	3	2	2	3	2																								2			2													2
0	5	1	853	50000	3	1	5	8	2																								2			2													2
5	4	3	854	20000	3	2	2	2	2																								2			2													2
19	2	7	901	180000	3	3	2	6	2																								2			2													2
12	3	4	902	200000	3	3	1	2	2																								2			2													2
14	4	6	903	88	3	3	1	5	2																								2			2													2
12	2	5	904	88	3	3	1	8	2																								2			2													2
5	2	3	905	14400	3	3	5	6	2																								2			2													2
5	5	3	906	240000	3	2	5	1	2																								2			2													2
7	3	3	907	88	3	3	1	6	2																								2			2													2
16	5	7	908	200000	3	3	2	2	2																								2			2													2
12	5	4	909	240000	3	3	2	6	2																								2			2													2
12	7	5	910	240000	3	3	2	6	2																								2			2													2
8	5	4	911	96000	3	1	1	3	2																								2			2													2
0	4	1	912	36000	3	1	2	6	2																								2			2													2
8	6	3	913	108000	3	1	1	5	2																								2			2													2
17	4	7	914	150000	3	3	2	3	2																								2			2													1
5	2	3	915	50000	3	2	2	6	2																								2			2													2
0	4	1	101	42000	3	1	2	2	2																								2			2													2
5	5	3	102	180000	3	1	1	3	2																								2			2													2
3	2	2	103	55000	3	1	2	6	2																								2			2													2
8	5	3	104	40250	3	1	2	6	2																								2			2													2
0	2	1	105	60000	3	1	2	6	2																								2			2													2
12	6	5	106	200000	3	3	2	6	2																								2			2													2
10	4	5	107	240000	3	3	2	3	2																								2			2													2
0	1	1	108	88	3	3	2	6	2																								2			2													2
7	2	3	109	72000	3	2	2	3	2																								2			2													2
0	2	1	110	48000	3	1	2	3	2																								2			2													1
0	4	1	111	90000	3	1	5	3	2																								2			2													2
0	2	1	112	60000	3	1	2	2	1	1	7				6																	2	2	3															1
8	2	3	916	40000	3	3	2	3	2																								2			2													1
12	4	5	917	72000	3	1	2	6	2																								2			2													2
10	8	4	918	228000	3	2	2	7	2																								2			2													2
7	4	3	919	360000	3	2	2	6	2																								2			2													2
0	5	1	920	88	3	1	2	3	1	1	15						16															2	2	1															1
10	7	5	921	88	3	2	5	7	2																								2			2													1
8	2	4	922	150000	3	3	5	6	2																								2			2													2
12	2	5	923	88	3	2	1	3	2																								2			2													2
10	2	4	924	300000	3	2	2	7	2																								2			2													1
10	3	5	925	360000	3	3	2	6	2																								2			2													2
5	4	3	926	84000	3	2	2	6	2																								2			2													2
10	3	4	927	120000	3	2	2	6	2																								2			2													2
5	5	2	928	150000	3	3	2	6	2																								2			2													2
10	4	4	929	120000	3	2	2	8	1	1	34						2															1	2	1															1
9	2	3	930	156000	3	3	2	7	1	1	77	77	77	77			20															1	2	2															1
8	5	3	931	96000	3	1	2	3	1	1	25						4															2	2	2															1
0	4	1	932	180000	3	1	2	6	2																								2			2													2
0	2	1	933	72000	3	1	2	6	2																								2			2													2
10	3	5	934	72000	3	1	2	2	1	1	18						10															2	1	3	1		3												1
0	2	1	935	88	3	1	2	6	2																								2			2													2
12	3	4	936	24000	3	1	1	5	2																								2			2													2
12	1	5	937	180000	3	2	2	6	2																								2			2													2
12	6	4	938	180000	3	2	2	3	2																								2			2													2
10	4	5	939	240000	3	3	2	6	2																								2			2													2
10	2	5	940	66000	3	3	2	2	1	1	18						25															1	2	2															2
8	6	4	941	114000	3	2	2	2	2															30									2			1		1											1
10	4	5	942	88	3	2	2	6	2																								2			2													2
15	5	6	943	180000	3	2	1	5	2																								2			2													2
10	4	5	944	120000	3	3	2	7	1	1	25				7777	7777	2															1	2	1															1
12	4	4	945	200000	3	3	1	3	2																								2			2													2
15	2	6	946	2040000	3	1	2	3	2																								2			2													2
12	4	5	947	420000	3	1	2	6	2																								2			2													2
5	3	3	948	100000	3	1	5	6	2																								2			2													2
0	2	1	949	60000	3	3	5	6	2																								2			2													2
8	2	4	950	60000	3	3	2	6	2																								2			2													2
12	2	5	951	200000	3	3	2	6	2																								2			2													2
9	3	3	952	96000	3	3	5	6	2																								2			2													2
8	2	4	953	156000	3	3	2	3	2																								2			2													2
15	6	6	954	216000	3	3	2	3	2																								2			2													2
5	4	3	1001	60000	3	2	2	3	2																								2			2													2
10	2	5	1002	96000	3	1	2	2	2															77									2			1		2											1
0	3	1	1003	72000	3	2	2	3	2																								2			2													2
5	4	3	1004	72000	3	1	2	2	2																								2			2													2
12	6	4	1005	120000	3	1	1	5	2																								2			2													2
12	2	5	1006	120000	3	1	1	3	2																								1		1	2	3												1
7	2	3	1007	72000	3	1	2	6	2																								2			2													2
0	2	1	1008	108000	3	2	2	2	1	1	28						4															2	2	2															1
17	3	6	1009	240000	3	3	2	5	2																								2			2													2
10	3	4	1010	72000	3	3	2	6	2																								2			2													2
9	4	3	1011	72000	3	3	1	3	2																								2			2													2
10	5	5	1012	180000	3	3	1	5	2																								2			2													2
0	2	1	1013	72000	3	1	2	6	2																								2			2													2
5	2	3	1014	60000	3	1	2	2	1	2	20						3															2	2	2				2											1
12	4	5	1015	960000	3	1	2	2	2																								2			2													2
8	2	3	1016	12000	3	1	2	8	2																								2			2													2
0	3	1	1017	60000	3	1	2	2	2																								2			2													1
10	2	5	1018	96000	3	1	2	3	2																								2			2													1
0	3	1	1019	72000	3	1	2	6	2																								2			2													2
12	6	5	1020	72000	3	1	1	6	2																								2			2													2
7	4	3	1021	108000	3	1	2	3	2																								2			2													2
5	2	3	1022	84000	3	1	2	2	2																								2			2													2
10	3	4	1023	60000	3	1	2	6	2																								2			2													2
9	2	3	1024	96000	3	1	2	2	2																								2			2													2
10	6	5	1025	72000	3	1	1	6	2																								2			2													2
0	2	1	1026	60000	3	1	2	3	2																								2			2													2
5	3	3	1027	72000	3	2	1	2	1	1	18						2															1	2	1															2
9	3	3	1028	120000	3	1	1	8	2																								1		1	2	7												1
10	5	5	1029	96000	3	1	1	8	2																								2			2													2
10	2	5	1030	48000	3	1	2	6	2																								2			2													2
8	2	3	1031	72000	3	1	2	6	2																								2			2													2
0	2	1	1032	300000	3	1	2	3	1	1	20						5															1	2	2															1
10	4	5	1033	96000	3	3	2	6	2																								2			2													2
12	3	5	1034	60000	3	3	1	2	2																								2			2													2
10	4	5	1035	60000	3	1	2	2	2																								2			2													2
8	2	3	1036	84000	3	1	2	3	2																								2			2													2
10	2	4	1037	120000	3	1	2	6	2																								2			2													2
9	4	3	1038	60000	3	3	2	3	2																								2			2													1
8	2	4	1039	120000	3	1	2	6	2																								2			2													2
10	2	4	1040	120000	3	1	2	6	2																								2			2													2
8	4	4	1041	96000	3	1	2	2	2																								2			2													1
5	3	2	1042	72000	3	1	2	2	1	1	18						16															2	2	2															1
0	5	1	1043	50000	3	3	2	6	2																								2			2													2
5	3	3	1044	70000	3	1	2	2	2																								2			2													1
10	2	5	1045	60000	3	3	2	6	2																								2			2													2
0	7	1	1046	84000	3	3	5	6	2																								2			2													2
5	2	3	1047	88	3	3	2	8	2																								1		1	2	10												1
0	5	1	1048	168000	3	3	2	6	2																								2			2													2
0	2	1	1049	100000	3	3	2	3	2																								2			2													2
9	2	3	1050	60000	3	1	2	2	2																								2			2													2
13	2	5	1051	88	3	1	2	6	2																								2			2													2
12	6	5	1052	72000	3	1	2	3	2																								2			2													1
0	5	1	1053	120000	3	3	2	6	2																								2			2													2
5	3	3	1054	60000	3	1	2	3	2																								2			2													2
10	3	5	1101	120000	3	2	2	3	2																								2			2													2
12	3	5	1102	216000	3	3	2	3	2																								2			2													2
12	6	5	1103	120000	3	3	2	8	2																								2			2													2
10	3	4	1104	72000	3	2	2	3	2																								2			2													2
14	3	5	1105	36000	3	2	1	5	2																								2			2													2
12	2	5	1106	144000	3	2	2	3	2																								2			2													2
15	4	6	1107	88	3	3	1	8	2																								2			2													2
10	4	4	1108	42000	3	2	2	6	2																								2			2													2
10	2	5	1109	72000	3	2	2	6	2																								2			2													2
12	2	5	1110	120000	3	2	2	3	2																								2			2													2
15	5	6	1111	1800000	3	3	2	1	2																								2			2													2
10	4	5	1112	60000	3	2	1	5	2																								2			2													2
10	7	5	1113	350000	3	3	2	1	2																								2			2													2
12	4	5	1114	88	3	3	4	1	1	1	26						20															2	2	1															1
10	2	5	1115	72000	3	1	2	6	2																								2			2													2
16	4	6	1117	420000	3	3	2	5	2																								2			2													2
12	3	5	1119	84000	3	3	2	6	2																								2			2													2
11	3	5	1120	48000	3	3	2	2	2																								2			2													2
12	3	5	1121	78000	3	3	2	2	2																								2			2													1
8	6	3	1122	88	3	1	2	6	2																								2			2													2
5	6	3	1123	216000	3	1	2	6	2																								2			2													2
16	5	6	1124	1200000	3	2	1	2	2																								2			2													2
7	5	3	1125	84000	3	2	2	2	2																								2			2													1
12	5	5	1126	120000	3	2	2	3	2																								2			2													2
12	2	5	1127	88	3	3	2	6	2																								2			2													2
10	5	4	1128	70000	3	3	2	3	2																								2			2													2
12	3	4	1129	88	3	3	2	6	2																								2			2													2
5	4	3	1130	72000	3	3	2	2	2																								2			2													2
12	2	4	1131	360000	3	3	2	6	2																								2			2													2
0	5	1	1132	60000	3	1	2	2	2																								2			2													2
0	4	1	1133	84000	3	1	2	6	2																								2			2													2
5	4	3	1134	240000	3	1	1	2	2																								2			2													1
10	2	4	1135	88	3	1	2	6	2																								2			2													2
12	5	5	1136	180000	3	1	2	2	2																								2			2													2
5	6	3	1137	50000	3	1	1	6	2																								2			2													2
12	3	1	1140	600000	3	1	2	3	1	1	25																					1	2	1															2
10	4	5	1141	132000	3	1	2	2	1	1	24						5															1	2	1															1
4	4	3	1142	79200	3	1	2	2	2																								2			2													2
0	5	1	1143	84000	3	1	2	6	2																								2			2													2
0	4	1	1144	120000	3	1	2	3	2																								2			2													1
12	4	5	1145	200000	3	1	1	2	2																								2			2													2
0	2	1	1146	144000	3	1	2	6	2																								2			2													2
0	3	1	1147	84000	3	1	2	3	2																								2			2													2
10	3	5	1138	132000	3	1	1	2	2																								2			2													2
8	3	4	1139	100000	3	1	2	6	2																								2			2													2
0	5	1	1148	72000	3	1	2	3	1	1	40						3															2	2	1															1
0	2	1	1149	120000	3	1	2	3	2																								2			2													2
1	4	2	1150	132000	3	3	1	2	1	1	12						8															2	1	2	1							4							1
0	2	1	1151	72000	3	1	2	6	2																								2			2													2
12	5	5	1152	96000	3	1	1	8	2																								2			2													2
7	3	3	1153	78000	3	1	2	6	2																								2			2													2
10	2	5	1154	50000	3	1	2	1	1	1	25				3																	1	2	2															1
0	2	1	1201	60000	3	1	2	6	2																								2			2													2
0	2	1	1202	48000	3	1	2	3	1	1	23						10															2	2	3															1
0	5	1	1203	60000	3	1	2	9	2																								2			2													2
2	3	2	1204	60000	3	1	2	3	2																								2			2													1
10	3	5	1205	84000	3	3	2	3	2																								2			2													2
5	3	3	1206	120000	3	3	2	6	2																								2			2													2
4	2	2	1207	72000	3	2	2	6	2																								2			2													2
0	5	1	1208	72000	3	1	2	6	2																								2			2													2
0	2	1	1209	48000	3	1	1	2	2																								1		1	2	7												1
0	4	1	113	84000	3	2	2	6	2																								2			2													2
0	3	1	114	36000	3	1	2	3	1	1	20				10																	2	2	3															1
0	2	1	115	48000	3	1	2	2	2																								2			2													2
0	4	1	116	120000	3	1	2	6	2																								2			2													2
0	3	1	117	84000	3	1	2	3	2																								2			2													2
10	7	5	118	100000	3	3	2	6	2																								2			2													2
0	2	1	1210	72000	3	1	2	2	2																								1		1	2	4												1
0	2	1	1211	9000	3	1	2	6	2																								2			2													2
0	2	1	1212	144000	3	1	2	3	2																								2			2													1
0	2	1	1213	60000	3	1	2	6	2																								2			2													2
8	3	3	1214	156000	3	3	2	1	2																								2			2													1
10	6	5	1215	120000	3	1	2	1	2																								2			2													1
10	2	5	1216	60000	3	2	2	3	2																								2			2													1
10	2	5	1217	100000	3	3	2	6	2																								2			2													2
0	4	1	1218	100000	3	2	2	3	2																								2			2													1
10	3	5	1219	120000	3	2	1	6	2																								2			2													2
8	3	4	1220	72000	3	2	1	6	2																								2			2													2
10	2	4	1221	84000	3	2	2	6	2																								2			2													2
0	2	1	1222	48000	3	1	2	2	1	1	18						8															1	1	2	1		1												1
0	2	1	1223	72000	3	3	1	6	2																								2			2													2
7	3	3	1224	240000	3	3	2	2	2																								1		2	2	7777		7777	7777	7777		3	7777	7777				1
0	2	1	1225	100000	3	3	2	6	2																								2			2													2
5	4	3	1226	14400	3	2	2	6	2																								2			2													2
0	3	1	1227	40000	3	3	2	3	2																								2			2													1
5	2	3	1228	100000	3	3	2	6	2																								2			2													2
0	2	1	1229	192000	3	3	2	6	2																								2			2													2
0	2	1	1230	60000	3	3	2	6	2																								2			2													2
4	2	2	1231	150000	3	3	2	6	2																								2			2													2
10	3	5	1232	48000	3	1	2	2	2																								2			2													1
0	5	1	1233	48000	3	1	2	6	2																								2			2													2
0	3	1	1234	78000	3	1	2	2	1	1	32						3															1	2	2															1
0	5	1	1235	84000	3	1	2	2	2																								2			2													1
0	4	1	1236	120000	3	1	2	6	2																								2			2													2
0	2	1	1237	36000	3	2	2	6	2																								2			2													2
5	4	3	1238	50000	3	3	5	6	2																								2			2													2
0	3	1	1239	88	3	3	2	6	2																								2			2													2
0	2	1	1240	108000	3	1	2	3	2																								2			2													1
0	2	1	1241	48000	3	1	2	6	2																								2			2													2
10	4	5	1242	480000	3	3	2	6	2																								2			2													2
12	3	4	1243	50000	3	3	2	6	2																								2			2													2
8	4	4	1244	500000	3	3	2	2	2																								2			2													1
0	2	1	1245	100000	3	3	2	6	2																								2			2													2
10	3	4	1246	100000	3	3	2	5	2																								2			2													2
0	4	1	1247	88	3	3	2	6	2																								2			2													2
10	4	5	1248	72000	3	3	2	3	2																								2			2													2
12	4	4	1249	60000	3	3	1	5	2																								2			2													2
10	4	5	1250	120000	3	3	88	6	2																								2			2													2
12	2	5	1251	80000	3	3	2	2	2																								2			2													2
12	3	4	1252	50000	3	3	1	8	2																								2			2													2
8	4	5	1253	200000	3	3	2	6	2																								2			2													2
6	4	3	1254	100000	3	3	2	3	2																								2			2													2
3	2	2	1301	960000	3	1	2	6	2																								2			2													2
10	2	5	1302	72000	3	1	2	3	1	1	25				10																	2	2	3															1
12	4	4	1303	96000	3	1	1	5	2																								2			2													2
5	6	1	1304	72000	3	1	1	3	2																								2			2													1
0	4	1	1305	84000	3	1	5	1	2																								2			2													2
0	2	1	1306	108000	3	88	2	3	2																								2			2													2
0	4	1	1307	100000	3	3	2	6	2																								2			2													2
15	4	6	1308	960000	3	2	2	1	2																								2			2													1
0	4	1	1309	40000	3	1	1	2	2																								2			2													2
12	4	5	1310	480000	3	2	1	1	2																								2			2													1
5	5	3	1311	96000	3	1	2	2	1	1	25						25															1	1	2	1							4							1
12	6	5	1312	100000	3	1	1	5	2																								2			2													2
5	4	2	1313	72000	3	1	1	8	2																								2			2													2
6	2	3	1314	54000	3	88	2	2	1	1	77	11					2															2	2	2															2
0	4	1	1315	100000	3	1	2	6	2																								2			2													2
12	2	5	1316	240000	3	3	2	1	2																								2			2													1
2	5	3	1317	60000	3	2	1	2	2																								2			2													1
5	6	3	1318	36000	3	1	2	6	2																								2			2													2
0	3	1	1319	48000	3	1	2	6	2																								2			2													2
15	2	5	1320	250000	3	3	2	3	2																								2			2													2
15	4	6	1321	100000	3	3	1	2	2																								2			2													2
6	2	3	1322	84000	3	3	2	2	2																								2			2													1
5	3	2	1323	72000	3	1	2	6	2																								2			2													2
10	3	5	1324	120000	3	3	2	2	2																								2			2													1
10	2	4	1325	84000	3	2	2	6	2																								2			2													2
18	9	7	1326	720000	3	3	1	2	2																								2			2													2
15	5	6	1327	150000	3	2	2	2	2																								2			2													2
12	2	5	1328	180000	3	3	2	3	2																								2			2													2
10	5	5	1329	102000	3	3	1	6	2																								2			2													2
18	3	4	1330	60000	3	3	2	6	2																								2			2													2
12	4	5	1331	20000	3	3	1	3	2																								2			2													2
12	2	5	1332	1200000	3	3	2	3	2																								2			2													2
0	3	1	1333	200000	3	3	2	6	2																								2			2													2
12	6	5	1334	300000	3	3	2	6	2																								2			2													2
12	6	5	1335	100000	3	1	2	5	2																								2			2													2
16	4	7	1336	100000	3	3	2	2	2																								2			2													2
17	4	5	1337	54000	3	1	1	6	2																								2			2													2
8	5	3	1338	180000	3	2	1	3	2																								2			2													2
12	4	4	1339	240000	3	3	2	3	2																								2			2													2
10	3	5	1340	100000	3	3	2	6	2																								2			2													2
17	4	7	1341	2400000	3	3	2	1	2																								2			2													2
0	3	1	1343	96000	3	3	2	6	2																								2			2													2
5	2	3	1344	120000	3	1	2	3	2																								2			2													2
12	4	4	1345	100000	3	3	2	6	2																								2			2													2
3	1	1	1346	24000	3	1	5	3	2																								2			2													2
5	5	3	1348	200000	3	3	2	6	2																								2			2													2
10	4	5	1349	120000	3	3	2	6	2																								2			2													2
12	3	5	1350	300000	3	2	2	1	2																								2			2													2
12	3	4	1351	600000	3	2	2	3	2																								2			2													2
9	5	4	1352	150000	3	3	2	6	2																								2			2													2
5	2	3	1353	60000	3	2	2	6	2																								2			2													2
10	2	5	1354	72000	3	3	2	3	2																								2			2													2
7	6	3	1401	12000	3	1	2	7	2																								2			2													2
0	4	1	1402	120000	3	1	2	2	2																								2			2													2
0	2	1	1403	60000	3	1	2	6	2																								2			2													2
0	4	1	1404	72000	3	1	2	2	2																								2			2													2
0	2	1	1405	84000	3	1	2	2	2																								2			2													2
10	2	4	1406	120000	3	1	2	2	2																								2			2													2
0	2	1	1407	84000	3	1	2	3	2																								2			2													2
0	1	1	1408	72000	3	1	5	3	2																								2			2													2
0	2	1	1409	96000	3	1	2	6	2																								2			2													2
10	5	4	1410	72000	3	1	2	2	2																								2			2													2
0	2	1	1411	60000	3	1	2	3	2																								2			2													2
2	5	2	1412	120000	3	3	2	7	2																								2			2													2
0	5	1	1413	72000	3	3	2	6	2																								2			2													2
10	5	5	1414	480000	3	2	2	3	2																								2			2													2
8	4	2	1415	1200000	3	3	2	3	2																								2			2													2
12	3	4	1416	6000	3	1	1	6	2																								2			2													2
12	6	4	1417	72000	3	2	2	3	2																								2			2													1
10	2	4	1418	88	3	3	2	2	2																								2			2													2
12	5	5	1420	100000	3	3	2	3	2																								2			2													2
8	4	2	1421	100000	3	3	2	3	2																								2			2													1
10	2	4	1422	50000	3	3	2	3	2																								2			2													1
14	3	4	1423	51600	3	3	5	2	2																								2			2													2
0	4	1	1424	60000	3	1	2	2	2																								2			2													1
5	3	2	1425	60000	3	1	1	2	2																								2			2													1
0	2	1	1426	60000	3	1	2	2	2																								2			2													1
0	7	1	1427	60000	3	1	2	6	2																								2			2													2
12	3	5	1428	180000	3	1	1	2	2																								2			2													2
0	2	1	1429	96000	3	1	2	2	2																								2			2													2
10	3	4	1430	72000	3	1	2	2	2																								1		1	2	4			0		0		0					1
12	4	4	1431	60000	3	3	2	2	2																								2			2													2
0	5	1	1432	108000	3	3	2	6	2																								2			2													2
15	1	6	1433	100000	3	3	2	3	2																								2			2													1
10	3	4	1434	240000	3	3	1	8	2																								2			2													1
12	4	4	1435	80000	3	3	1	3	2																								2			2													2
4	4	2	1436	60000	3	3	2	2	2																								1		2	2	7777		7777	7777	7777		6	7777	7777				1
5	3	2	1437	100000	3	3	2	3	2																								2			2													1
10	6	5	1438	600000	3	3	2	3	2																								2			2													2
10	6	5	1439	100000	3	3	2	3	2																								2			2													1
12	4	4	1440	120000	3	2	2	3	2																								2			2													2
14	4	4	1441	88	3	3	1	5	2																								2			2													2
0	3	1	1442	120000	3	1	1	2	2																								2			2													2
0	4	1	1443	84000	3	1	2	6	2																								2			2													2
12	3	4	1444	700000	3	3	2	3	2																								2			2													1
12	4	4	1445	240000	3	3	1	1	2																								2			2													2
0	3	1	1446	60000	3	1	2	6	2																								2			2													2
0	15	1	1447	120000	3	1	2	6	2																								2			2													2
0	5	1	1448	100000	3	3	2	6	2																								2			2													2
10	6	4	1449	100000	3	3	2	6	2																								2			2													2
1	3	5	1450	96000	3	3	1	6	2																								2			2													2
10	4	4	1451	80000	3	3	5	2	2																								2			2													2
5	5	3	1452	84000	3	3	2	6	2																								2			2													2
0	2	1	1453	120000	3	3	2	6	2																								2			2													2
8	6	3	1454	100000	3	3	2	6	2																								2			2													2
12	2	4	1501	0	3	3	2	6	2																								2			2													2
10	6	5	1502	200000	3	2	2	3	2																								1		2	2	7777		7777	7777	7777	7777	7777	7777	7777				1
5	5	3	1503	180000	3	3	2	6	2																								2			2													2
5	2	3	1505	72000	3	1	2	6	2																								2			2													2
5	2	3	1506	72000	3	1	2	3	2																								1		1	2						8							1
0	2	1	1507	72000	3	1	2	6	2																								2			2													2
8	3	3	1508	36000	3	1	1	2	2																								2			2													2
7	3	3	1509	108000	3	3	2	6	2																								2			2													2
0	7	1	1510	120000	3	1	5	7	2																								2			2													2
5	5	3	1511	16800	3	1	1	3	1	1	16						2															1	2	1															1
10	2	4	1512	36000	3	1	2	3	2																								2			2													1
4	2	2	1513	72000	3	3	2	6	2																								2			2													2
11	2	5	1514	540000	3	3	5	7	2																								2			2													1
15	3	6	1515	300000	3	3	1	5	2																								2			2													2
8	6	4	1516	240000	3	88	2	6	2																								2			2													2
10	3	5	1517	50000	3	3	5	6	2																								2			2													2
5	3	1	1518	50000	3	3	2	7	2																								2			2													2
12	6	5	1519	180000	3	3	2	3	2																								2			2													2
10	5	5	1520	240000	3	2	2	3	2																								2			2													2
15	4	6	1521	200000	3	2	1	5	2																								2			2													2
0	3	1	1522	100000	3	3	2	6	2																								2			2													2
12	3	5	1523	72000	3	1	2	6	2																								2			2													2
10	5	5	1524	72000	3	3	2	6	2																								2			2													2
0	8	1	1525	80000	3	3	2	6	2																								2			2													2
8	2	4	1526	72000	3	1	2	3	1	1	16						16															2	1	2	1							4							1
4	2	2	1527	48000	3	1	2	3	2															40									2			1		1											2
5	3	3	1528	72000	3	2	2	2	2																								2			2													1
12	4	4	1529	120000	3	2	2	2	2																								2			2													1
12	4	5	1530	100000	3	2	1	3	2																								2			2													2
6	6	2	1531	60000	3	3	2	3	2																								2			2													1
12	3	5	1532	60000	3	3	1	2	2																								2			2													2
0	2	1	1533	60000	3	3	5	6	2																								2			2													2
0	2	1	1534	84000	3	2	2	3	2																								2			2													1
12	4	5	1535	240000	1	2	2	2	2																								2			2													1
15	6	6	1536	216000	3	1	2	6	2																								2			2													2
5	3	3	1537	84000	3	1	2	3	2																								2			2													1
0	1	1	1538	9600	3	3	5	6	2																								2			2													2
0	2	1	1539	40000	3	3	2	6	2																								2			2													2
3	4	2	1540	114000	3	3	2	7	2																								2			2													1
0	6	1	1541	84000	3	3	2	3	2																								2			2													2
10	4	4	1542	132000	3	3	2	6	2																								2			2													2
12	4	5	1543	88	3	3	1	5	2																								2			2													2
0	7	1	1544	840000	3	3	1	3	2																								2			2													1
0	6	1	1545	216000	3	3	2	3	2																								2			2													2
0	2	1	1546	60000	3	2	1	3	2																								2			2													2
8	3	4	1547	60000	3	3	2	6	2																								2			2													2
0	2	1	1548	108000	3	1	2	3	1	2	25					7777																2	1	3	1			2				5							1
10	4	5	1549	100000	3	3	2	3	2																								2			2													1
0	5	1	1550	150000	3	3	2	3	2																								2			2													2
8	5	3	1551	120000	3	3	2	6	2																								2			2													2
12	4	5	1552	180000	3	3	2	7	2																								2			2													2
10	2	5	1553	60000	3	3	1	5	2																								2			2													2
8	3	3	1554	120000	3	1	2	2	2																								1		1	2	4												1
12	5	4	1601	480000	3	3	2	2	2																								2			2													2
7	3	4	1602	240000	3	2	2	2	2																								2			2													2
8	4	3	1603	10000	3	3	2	6	2																								2			2													2
3	2	2	1604	120000	3	3	2	3	2																								2			2													2
15	6	6	1605	200000	3	3	2	6	2																								2			2													2
10	3	5	1606	300000	3	3	2	6	2																								2			2													2
5	4	3	1607	100000	3	3	2	6	2																								2			2													2
10	5	5	1608	200000	3	3	2	3	2																								2			2													2
10	4	5	1609	180000	3	3	2	6	2																								2			2													2
10	5	5	1610	200000	3	3	2	3	2																								2			2													2
8	4	3	1611	120000	3	2	2	2	2																								2			2													2
12	3	4	1612	60000	3	88	2	3	2																								2			2													2
7	2	3	1613	120000	3	3	2	6	2																								2			2													2
0	1	1	1614	36000	3	3	3	3	2																								2			2													1
12	4	4	1615	36000	3	3	2	3	2																								2			2													2
10	8	5	1616	300000	3	3	2	6	2																								2			2													2
5	6	3	1617	36000	3	88	2	3	2																								1		1	2						1							1
0	5	1	1618	60000	3	3	2	3	2																								2			2													2
10	2	5	1619	36000	3	3	2	6	2																								2			2													2
0	2	1	1620	6000	3	1	2	6	2																								2			2													2
15	4	6	1621	720000	3	3	2	1	2																								2			2													2
12	2	4	1622	150000	3	3	2	3	2																								2			2													2
8	3	3	1623	100000	3	3	2	6	2																								2			2													2
12	3	5	1624	14400	3	2	1	2	2																								2			2													2
10	2	5	1625	36000	3	2	2	6	2																								2			2													2
13	3	6	1626	180000	3	2	2	3	2																								2			2													1
10	4	5	1627	400000	3	3	2	6	2																								2			2													2
10	2	4	1628	40000	3	3	2	3	2																								2			2													1
13	3	5	1629	80000	3	3	1	5	2																								2			2													2
7	4	2	1630	100000	3	3	2	3	2																								2			2													1
10	3	5	1631	216000	3	3	2	2	2																								2			2													1
0	2	1	1632	70000	3	3	2	2	2																								2			2													1
10	2	5	1633	192000	3	3	2	7	2																								2			2													2
8	3	3	1634	72000	3	1	2	2	2																								1		1	2	4												2
8	2	4	1635	45600	3	1	2	6	2																								2			2													2
0	2	1	1636	60000	3	3	2	6	2																								2			2													2
0	3	1	1637	40000	3	1	2	3	2																								2			2													2
12	2	5	1638	120000	3	3	2	1	2																								2			2													1
0	3	1	1639	6600	3	2	5	3	2																								2			2													2
8	3	3	1640	60000	3	3	2	6	2																								2			2													2
12	2	5	1641	60000	3	2	2	6	2																								2			2													2
8	2	4	1643	36000	3	3	2	6	2																								2			2													2
6	3	3	1644	72000	3	2	2	2	1	1	18						5															1	2	3															1
8	4	4	1645	100000	3	3	2	6	2																								2			2													2
12	5	5	1646	180000	3	2	1	5	2																								2			2													2
8	2	4	1647	72000	3	2	2	6	2																								2			2													2
10	4	5	1648	180000	3	3	2	3	2																								2			2													1
0	2	1	1649	72000	3	1	2	6	2																								2			2													2
7	2	2	1650	60000	3	1	2	6	2																								2			2													2
8	2	3	1651	72000	3	2	2	6	2																								2			2													2
8	2	4	1652	72000	3	2	2	3	2																								2			2													2
5	5	3	1653	180000	3	3	2	6	2																								2			2													2
5	6	3	1654	88	3	3	2	6	2																								2			2													2
5	3	3	1701	50000	3	3	88	3	2																								2			2													2
0	3	1	1702	24000	3	3	1	3	2																								2			2													2
10	2	3	1703	120000	3	3	2	6	2																								2			2													2
0	3	1	1704	48000	3	3	5	3	2																								2			2													2
9	4	4	1705	36000	3	3	2	3	2																								1		1	2	1												1
0	3	1	1706	120000	3	3	2	6	2																								2			2													2
0	6	1	1707	100000	3	3	2	3	2																								2			2													2
11	4	4	1708	88	3	3	1	5	2																								2			2													2
10	2	5	1709	120000	3	3	2	6	2																								2			2													2
5	2	3	1710	48000	3	3	2	3	2																								2			2													1
5	2	3	1711	90000	3	1	2	6	2																								2			2													2
8	2	4	1712	72000	3	1	2	2	2																								1		1	2	15												1
10	3	4	1713	120000	3	1	2	2	2																								2			2													1
0	2	1	1714	75000	3	1	2	6	2																								2			2													2
0	2	1	1715	144000	3	1	2	2	2																								2			2													2
5	4	3	1716	120000	3	3	2	6	2																								2			2													2
0	4	1	1717	88	3	3	2	6	2																								2			2													2
0	2	1	1718	96000	3	1	2	3	2																								2			2													2
8	2	4	1719	66000	3	1	2	6	2																								2			2													2
0	3	1	1720	108000	3	3	2	4	2																								2			2													2
8	3	4	1721	42000	3	3	2	7	2																								2			2													2
5	2	2	1722	70000	3	3	2	3	2																								2			2													1
0	2	1	1723	198000	3	2	2	3	2																								2			2													2
10	4	4	1724	200000	3	3	2	3	2																								2			2													2
12	3	5	1725	40000	3	1	1	5	2																								2			2													2
10	3	5	1726	360000	3	3	2	3	2																								2			2													1
8	4	4	1727	50000	3	3	2	6	2																								2			2													2
12	3	5	1728	100000	3	3	1	8	2																								2			2													2
12	6	5	1729	72000	3	3	2	3	2																								2			2													1
5	3	3	1730	88	3	3	2	6	2																								2			2													2
10	3	5	1731	500000	3	3	2	3	2																								2			2													2
8	4	4	1732	500000	3	3	2	6	2																								2			2													2
12	3	5	1733	300000	3	3	2	6	2																								2			2													2
12	4	5	1734	720000	3	3	2	3	2																								2			2													2
10	2	5	1735	60000	3	3	2	6	2																								2			2													2
6	3	3	1736	88	3	3	2	6	2																								2			2													2
10	4	5	1737	156000	3	3	2	6	2																								2			2													2
6	2	3	1738	88	3	3	5	6	2																								2			2													2
10	5	5	1739	120000	3	3	2	6	2																								2			2													2
5	3	3	1740	100000	3	3	2	6	2																								2			2													2
12	2	5	1741	88	3	3	2	6	2																								2			2													2
5	4	3	1742	1000000	3	3	2	6	2																								2			2													2
8	5	4	1743	250000	3	3	2	6	2																								2			2													2
5	2	3	1744	36000	3	3	2	3	2																								2			2													2
12	4	5	1745	500000	3	3	2	3	2																								2			2													2
16	3	7	1746	240000	3	3	1	5	2																								2			2													2
7	3	3	1747	300000	3	3	2	3	2																								2			2													2
19	5	7	1748	360000	3	3	2	2	2																								2			2													2
0	6	1	1749	200000	3	3	5	9	2																								2			2													2
10	4	5	1750	6000000	3	3	2	6	2																								2			2													2
8	6	4	1751	24000	3	2	2	3	2																								2			2													2
10	8	5	1752	88	3	2	2	6	2																								2			2													2
10	4	5	1753	600000	3	3	2	6	2																								2			2													2
4	4	1	1754	72000	3	3	2	3	2																								1		1	2	7												1
10	4	4	1801	420000	3	3	2	6	2																								2			2													2
10	3	5	1802	96000	3	3	2	2	2																								2			2													1
11	6	4	1803	120000	3	3	2	6	2																								2			2													2
15	6	6	1804	84000	3	3	2	2	2																								2			2													2
12	2	5	1805	120000	3	3	2	3	2																								2			2													2
5	3	2	1806	140000	3	3	2	6	2																								2			2													2
0	2	1	1807	144000	3	3	2	3	2																								2			2													2
0	4	1	1808	36000	3	3	2	3	2																								2			2													1
12	6	5	1809	240000	3	3	1	3	2																								2			2													2
0	5	1	1810	50000	3	3	2	3	2																								2			2													1
12	4	4	1811	108000	3	3	1	5	2																								2			2													2
10	4	4	1812	88	3	3	2	6	2																								2			2													2
12	3	5	1813	420000	3	3	1	5	2																								2			2													2
6	4	3	1814	300000	3	3	2	7	2																								2			2													2
5	3	3	1815	150000	3	3	5	6	2																								2			2													2
10	4	4	1816	120000	3	3	2	6	2																								2			2													2
10	4	5	1817	180000	3	3	2	2	2																								2			2													2
12	3	5	1818	120000	3	3	2	3	2																								2			2													2
0	3	1	1819	72000	3	1	3	6	2																								2			2													2
6	2	3	1820	72000	3	3	2	3	2																								1		1	2	25												1
5	2	3	1821	60000	3	3	2	2	2																								2			2													2
10	8	5	1822	180000	3	3	2	3	2																								2			2													2
10	2	4	1823	54000	3	3	2	6	2																								2			2													2
0	2	1	1824	96000	3	3	2	3	2																								1		1	2	5												1
12	7	5	1825	200000	3	3	2	3	2																								2			2													2
8	6	4	1826	240000	3	3	2	6	2																								2			2													2
12	2	4	1827	120000	3	3	2	6	2																								2			2													2
10	4	5	1828	72000	3	3	2	2	2																								2			2													2
5	8	3	1829	700000	3	3	2	6	2																								2			2													2
5	4	3	1830	50000	3	3	2	6	2																								2			2													2
12	3	5	1831	88	3	2	2	6	2																								2			2													2
10	3	5	1832	216000	3	3	2	6	2																								2			2													2
5	3	3	1833	125000	3	3	2	6	2																								2			2													2
10	3	4	1834	96000	3	2	2	3	2																								2			2													2
0	2	1	1835	72000	3	2	5	2	2																								2			2													2
0	4	1	1836	84000	3	2	2	6	2																								2			2													2
8	4	3	1837	88	3	3	2	6	2																								2			2													2
10	3	4	1838	300000	3	3	1	5	2																								2			2													2
12	8	5	1839	100000	3	3	2	6	2																								2			2													2
7	2	3	1840	88	3	3	2	6	2																								2			2													2
5	4	3	1841	88	3	3	2	6	2																								2			2													2
0	4	1	1842	96000	3	1	2	2	2																								2			2													2
5	2	3	1843	96000	3	2	2	6	2																								2			2													2
8	7	4	1844	360000	3	1	2	2	2																								2			2													2
5	3	3	1845	300000	3	3	2	6	2																								2			2													2
10	3	5	1846	180000	3	3	2	2	2																								2			2													2
6	4	3	1847	80000	3	3	2	6	2																								2			2													2
7	5	3	1848	200000	3	2	2	3	2																								2			2													2
6	2	2	1849	200000	3	3	2	6	2																								2			2													2
10	3	5	1850	96000	3	3	2	6	2																								2			2													2
7	2	3	1851	108000	3	2	2	3	2																								2			2													2
5	3	3	1852	48000	3	3	1	2	1	1	20					2		3														1	2	3															2
0	5	1	1853	88	3	3	2	6	2																								2			2													2
12	4	5	1854	264000	3	3	2	2	2																								2			2													2
15	4	6	1901	100000	3	2	2	2	2																								2			2													2
5	2	3	1902	54000	3	1	2	2	2																								2			2													2
0	3	1	1903	91440	3	1	2	2	2																								2			2													2
5	2	3	1904	36000	3	1	2	2	2																								2			2													2
10	3	4	1905	228000	3	1	1	2	2																								2			2													2
10	6	4	1906	180000	3	1	1	2	2																								2			2													2
12	2	5	1907	60000	3	1	2	6	2																								2			2													2
10	6	5	1908	72000	3	1	2	3	2																								2			2													2
7	3	3	1909	72000	3	1	1	2	1	2	16						2															1	2	2				2											1
10	5	5	1910	75000	3	1	1	5	2																								2			2													2
10	5	4	1911	50000	3	1	2	2	2																								2			2													2
0	6	1	1912	120000	3	1	2	6	2																								2			2													2
0	3	1	1913	60000	3	1	2	6	2																								2			2													2
6	4	3	1914	72000	3	1	2	2	2																								2			2													2
5	3	3	1915	84000	3	2	2	2	1	1	77	77	77	77			2															1	2	2															1
7	6	3	1916	180000	3	1	2	6	2																								2			2													2
7	5	2	1917	120000	3	1	1	2	1	1	20				2		5															1	2	2															2
0	5	1	1918	60000	3	1	2	6	2																								2			2													2
12	4	5	1919	180000	3	1	2	2	2																								2			2													2
10	3	5	1920	400000	3	3	2	6	2																								2			2													2
12	4	5	1921	300000	3	3	2	3	2																								2			2													1
6	3	3	1922	150000	3	3	2	2	2																								2			2													2
4	2	2	1923	60000	2	3	2	6	2																								2			2													2
10	4	4	1924	100000	3	3	2	2	2																								2			2													2
10	5	5	1925	250000	3	3	2	3	2																								2			2													2
14	5	5	1926	100000	3	3	1	5	2																								2			2													2
8	3	4	1927	88	3	3	2	3	2																								2			2													2
10	7	4	1928	100000	3	3	2	2	2																								2			2													2
5	4	3	1929	150000	3	3	2	3	2																								2			2													2
5	5	3	1930	500000	3	3	2	3	2																								2			2													1
10	3	4	1931	150000	3	3	2	7	2																								2			2													1
10	6	4	1932	120000	3	2	2	2	2																								2			2													1
12	4	5	1933	60000	3	3	2	1	2																								2			2													2
0	2	1	1934	40000	3	1	1	3	2																								2			2													1
4	5	2	1935	36000	3	3	5	3	2																								2			2													1
6	5	3	1936	144000	3	3	2	2	2																								1		1	2						4							1
15	4	6	1937	500000	3	3	2	6	2																								2			2													2
12	5	4	1938	24000	3	2	1	6	2																								2			2													2
8	2	3	1939	84000	3	3	2	3	2																								1		1	2	10												1
20	3	7	1940	120000	3	3	2	1	2																								2			2													2
12	2	5	1941	84000	3	2	1	5	2																								2			2													2
15	3	6	1942	120000	3	3	1	5	2																								2			2													2
8	3	3	1943	48000	3	2	1	4	2																								2			2													2
0	1	1	1944	88	3	3	4	6	2																								2			2													2
10	3	5	1945	100000	3	3	1	4	2																								2			2													1
12	8	5	1946	150000	3	3	1	2	2																								2			2													2
10	4	4	1947	120000	3	3	2	3	2																								2			2													2
8	4	4	1948	180000	3	3	2	3	2																								2			2													2
12	3	4	1949	240000	3	3	2	2	2																								2			2													2
8	4	4	1950	40000	3	3	2	6	2																								2			2													2
5	3	3	1951	66000	3	3	2	2	2																								2			2													1
0	4	1	1952	60000	3	2	2	6	2																								2			2													2
12	4	5	1953	120000	3	3	2	6	2																								2			2													2
0	4	1	1954	100000	3	3	2	2	2																								2			2													1
12	1	5	2001	300000	3	1	2	6	2																								2			2													2
12	4	4	2002	300000	3	3	2	7	2																								2			2													2
6	4	3	2003	35000	3	3	2	6	2																								2			2													2
6	3	3	2004	120000	3	3	2	3	1	1	28						17															1	2	1															1
10	3	5	2005	108000	3	2	2	1	2																								2			2													2
5	3	3	2006	240000	3	3	2	6	2																								2			2													2
12	4	5	2007	120000	3	1	2	6	2																								2			2													2
8	3	3	2008	84000	3	3	2	3	2																								2			2													1
5	5	3	2009	50000	3	1	1	2	2																								2			2													2
4	4	2	2010	180000	3	3	2	3	2																								2			2													2
0	4	1	2011	84000	3	2	2	3	2																								2			2													2
0	2	1	2012	72000	2	1	2	2	1	1	18						5															1	2	1															1
0	2	1	2013	72000	3	1	5	6	2																								2			2													2
10	3	5	2014	66000	3	1	2	2	1	1	25						12															1	2	1															1
10	3	5	2015	88	3	3	2	6	2																								2			2													2
0	4	1	2016	120000	3	3	2	3	2																								2			2													2
10	3	4	2017	200000	3	3	4	3	2																								2			2													1
10	4	5	2018	500000	3	3	2	2	2																								2			2													2
8	2	4	2019	72000	3	3	3	2	2																								2			2													2
10	6	4	2020	96000	3	3	2	3	2																								2			2													1
0	1	1	2021	72000	3	1	5	2	2																								2			2													1
15	5	6	2022	120000	3	1	1	5	2																								2			2													2
10	2	5	2023	60000	3	1	2	3	2																								2			2													2
10	1	5	2024	30000	3	1	5	1	2																								2			2													2
5	2	3	2025	72000	3	1	2	6	2																								2			2													2
0	3	1	2026	72000	3	3	2	6	2																								2			2													2
0	3	1	2027	60000	3	1	2	3	2																								2			2													2
0	5	1	2028	120000	3	2	2	6	2																								2			2													2
5	4	3	2029	180000	3	1	2	2	2																								2			2													2
10	6	5	2030	3000000	3	3	2	6	2																								2			2													2
10	6	5	2031	180000	3	1	1	8	2																								2			2													2
10	2	5	2032	100000	3	3	2	3	2																								2			2													1
8	6	4	2033	70000	3	1	2	2	1	1	20						2															1	2	1															1
10	2	5	2034	84000	3	3	2	6	2																								2			2													2
5	2	3	2035	84000	3	1	5	6	2																								2			2													2
8	2	3	2036	72000	3	1	2	2	2																								2			2													1
9	4	4	2037	60000	3	1	2	6	2																								2			2													2
8	4	4	2038	200000	3	3	2	3	2																								2			2													2
7	4	3	2039	72000	3	3	1	2	2																								2			2													2
8	4	4	2040	36000	3	1	2	2	2																								2			2													1
0	3	1	2041	36000	3	1	2	2	2																								2			2													1
10	4	4	2042	180000	3	3	2	3	2																								2			2													1
10	3	5	2043	216000	3	3	5	1	2																								2			2													2
8	5	4	2044	120000	3	3	2	6	2																								2			2													2
15	4	6	2045	200000	3	3	2	3	2																								2			2													1
8	3	4	2046	72000	3	1	2	6	2																								2			2													2
9	4	4	2047	60000	3	2	2	6	2																								2			2													2
5	2	3	2048	200000	3	3	2	3	2																								2			2													2
12	3	5	2049	84000	3	2	2	6	2																								2			2													2
9	4	4	2050	36000	3	1	2	3	2																								2			2													1
12	3	5	2051	70000	3	3	1	2	2																								2			2													2
0	2	1	2052	200000	3	3	2	6	2																								2			2													2
0	3	1	2053	36000	3	1	2	6	2																								2			2													2
0	3	1	2054	84000	3	1	2	2	2																								1		1	2						3							1
0	5	1	2101	150000	3	3	2	3	2																								2			2													1
12	6	5	2102	20000	3	3	2	3	2																								2			2													2
12	6	5	2103	100000	3	3	2	3	2																								2			2													2
0	2	1	2104	50000	3	3	2	3	2																								2			2													1
8	5	4	2105	88	3	3	2	3	2																								2			2													1
10	2	5	2106	100000	3	3	2	3	2																								2			2													1
0	2	1	2107	120000	3	3	2	6	2																								2			2													2
10	3	5	2108	240000	3	3	1	1	2																								2			2													2
8	5	4	2109	100000	3	3	2	6	2																								2			2													2
10	1	5	2110	80000	3	3	5	3	2																								2			2													1
8	4	4	2111	36000	3	3	1	3	2																								2			2													1
9	6	3	2112	100000	3	3	2	3	2																								2			2													1
4	3	2	2113	120000	3	3	2	6	2																								2			2													2
0	4	1	2114	100000	3	3	2	3	2																								2			2													1
0	6	1	2115	60000	3	3	2	6	2																								2			2													2
3	6	2	2116	200000	3	3	2	6	2																								2			2													2
0	2	1	2117	84000	3	3	2	6	2																								2			2													2
0	4	1	2118	50000	3	3	2	3	2																								2			2													1
0	1	1	2119	25000	3	3	5	6	2																								2			2													2
15	4	6	2120	150000	3	3	2	3	2																								2			2													1
8	2	4	2121	84000	3	3	2	6	2																								2			2													2
13	2	5	2122	180000	3	3	2	7	2																								2			2													2
0	2	1	2123	50000	3	3	5	6	2																								2			2													2
5	2	2	2124	40000	3	3	2	3	2																								2			2													2
5	3	2	2125	60000	3	1	1	3	2																								2			2													2
10	3	5	2126	60000	3	3	2	6	2																								2			2													2
8	4	3	2127	84000	3	3	2	3	2																								2			2													1
0	4	1	2128	18000	3	3	2	2	2																								1		1	2	0			0		5		0					1
6	2	2	2129	60000	3	3	2	6	2																								2			2													2
5	5	2	2130	60000	3	3	2	3	2																								2			2													1
10	1	4	2131	60000	3	3	5	6	2																								2			2													2
10	6	5	2132	65000	3	3	2	3	2																								2			2													1
10	3	5	2133	24000	3	3	2	6	2																								2			2													2
10	4	5	2134	70000	3	3	2	3	2																								1		2	2			0		0		4		0				1
0	3	1	2135	150000	3	3	5	6	2																								2			2													2
10	3	5	2136	150000	3	3	2	3	2																								2			2													2
0	2	1	2137	100000	3	3	2	6	2																								2			2													2
5	3	3	2138	36000	3	3	5	6	2																								2			2													2
2	4	2	2139	84000	3	3	2	6	2																								2			2													2
10	2	5	2140	60000	3	3	2	3	2																								2			2													1
7	5	3	2141	3600000	3	3	2	3	2																								2			2													1
0	3	1	2142	96000	3	88	5	6	2																								2			2													1
8	2	4	2143	84000	3	3	2	6	2																								2			2													2
12	5	5	2144	200000	3	3	1	5	2																								2			2													2
10	2	5	2145	100000	3	3	2	6	2																								2			2													2
0	4	1	2146	60000	3	3	3	6	2																								2			2													2
0	4	1	2147	96000	3	1	2	6	2																								2			2													2
5	1	2	2148	7000	3	3	5	6	2																								2			2													2
0	1	1	2149	80000	3	88	2	3	2																								2			2													1
0	4	1	2150	70000	3	3	2	3	2																								2			2													1
0	3	1	2151	40000	3	3	2	3	2																								1		2	2			1		1		0		0				1
0	2	1	2153	120000	3	3	2	6	2																								2			2													2
0	6	1	2154	88	3	3	3	6	2																								2			2													2
6	6	3	2201	360000	3	1	2	3	2																								1		1	2	5												1
0	2	1	2202	72000	3	3	2	3	2																								1		1	2	1												1
15	2	6	2203	120000	3	3	5	6	2																								2			2													2
8	2	5	2204	80000	3	1	2	3	2																								2			2													1
5	4	3	2205	54000	3	1	2	8	2																								2			2													2
12	2	4	2206	84000	3	3	1	3	2																								2			2													2
0	2	1	2207	600000	3	2	2	6	2																								2			2													2
5	3	3	2208	48000	3	1	2	3	2																								2			2													1
10	2	5	2209	432000	3	1	2	6	2																								2			2													2
10	4	5	2210	600000	3	1	2	7	2																								2			2													1
10	3	5	2211	72000	3	3	2	3	2															10									1		1	1	4	1											1
5	4	3	2212	100000	3	3	1	3	2																								1		1	2	1												1
9	6	5	2213	300000	3	3	2	3	2																								2			2													1
0	4	1	2214	100000	3	3	2	9	2																								2			2													1
8	4	4	2215	540000	3	3	1	2	2																								2			2													1
12	4	5	2216	15000	3	3	2	6	2																								2			2													2
13	6	5	2217	150000	3	3	2	6	2																								2			2													2
0	3	1	2218	60000	3	1	88	6	2																								2			2													2
0	3	1	2219	96000	3	3	2	6	2																								2			2													2
5	4	3	2220	80000	3	3	2	3	2															44									1		1	1	1	1											1
5	2	3	2221	300000	3	3	2	6	2																								2			2													2
8	4	3	2222	100000	3	3	2	6	2																								2			2													2
10	3	5	2223	100000	3	3	2	6	2																								2			2													2
0	5	1	2224	150000	3	3	2	6	2																								2			2													2
0	5	1	2225	900000	3	3	2	3	2																								2			2													1
10	4	5	2226	84000	3	3	2	6	2																								2			2													2
12	3	5	2227	1200000	3	3	2	3	2																								2			2													1
0	4	1	2228	70000	3	3	2	3	2																								2			2													1
12	2	5	2229	40000	3	3	5	6	2																								2			2													2
10	3	5	2230	540000	3	3	2	6	2																								2			2													2
10	5	5	2231	60000	3	3	2	3	2																								2			2													1
15	4	6	2232	300000	3	3	2	3	2																								2			2													1
15	3	6	2233	180000	3	3	2	1	2																								2			2													2
10	4	4	2234	144000	3	2	2	7	2																								2			2													1
10	3	4	2235	48000	3	3	2	6	2																								2			2													2
12	3	4	2236	35000	3	2	1	5	2																								2			2													2
0	2	1	2237	50000	3	3	2	6	2																								2			2													2
0	3	1	2238	40000	3	3	2	3	2																								2			2													1
15	4	6	2239	60000	3	3	5	2	2																								2			2													2
10	3	4	2240	1680000	3	3	1	5	2																								2			2													2
2	3	2	2241	150000	3	3	2	3	2																								2			2													1
0	4	1	2242	100000	3	3	2	6	2																								2			2													2
18	2	7	2243	600000	3	3	2	1	2																								2			2													2
0	3	1	2244	48000	3	3	2	3	2																								2			2													1
8	4	4	2245	20000	3	3	2	3	2																								1		1	2						4							1
8	3	5	2246	50000	3	3	2	6	2																								2			2													2
12	3	5	2247	70000	3	2	1	6	2																								2			2													2
8	4	3	2248	72000	3	2	1	1	1	2	19							1														1	1	2	1		6	2											1
11	3	4	2249	7000	3	1	1	5	2																								2			2													2
14	5	6	2250	60000	3	1	1	5	2																								2			2													2
0	3	1	2251	96000	3	88	2	3	2																								1		1	2						3							1
0	4	1	2252	36000	3	1	2	6	2																								2			2													2
0	2	1	2253	72000	3	1	2	6	2																								2			2													2
5	2	2	2254	60000	3	1	2	3	2																								2			2													1
10	8	5	2301	100000	3	3	1	3	2																								2			2													2
5	4	3	2302	70000	3	3	2	6	2																								2			2													2
0	3	1	2303	300000	3	3	2	6	2																								2			2													2
0	5	1	2304	40000	3	3	2	3	2																								1		1	2	7												1
10	4	5	2306	70000	3	3	2	3	2																								2			2													2
5	2	3	2307	100000	3	3	2	6	2																								2			2													2
8	2	3	2308	30000	3	3	2	8	2																								2			2													1
0	2	1	2309	88	3	3	2	6	2																								2			2													2
8	3	4	2310	264000	3	3	2	1	2																								2			2													2
0	5	1	2311	20000	3	3	2	3	2																								2			2													1
0	4	1	2312	90000	3	3	2	6	2																								2			2													2
10	4	4	2313	216000	3	3	2	6	2																								2			2													2
10	3	5	2314	180000	3	3	2	3	2																								2			2													2
0	2	1	2315	48000	3	1	2	6	2																								2			2													2
0	5	1	2316	48000	3	1	2	6	2																								2			2													2
0	3	1	2317	60000	3	1	2	3	2																								2			2													1
10	4	5	2318	300000	3	3	2	1	2																								2			2													2
0	2	1	2319	72000	3	1	2	6	2																								2			2													2
0	4	1	2320	88	3	1	2	6	2																								2			2													2
0	4	1	2321	84000	3	1	2	3	2																								2			2													1
0	2	1	2322	72000	3	1	1	6	2																								2			2													2
0	2	1	2323	72000	3	1	5	6	2																								2			2													2
0	6	1	2324	72000	3	1	2	3	2																								2			2													1
0	2	1	2325	72000	3	1	2	6	2																								2			2													2
0	8	1	2326	72000	3	1	2	6	2																								2			2													2
0	6	1	2327	100000	3	3	2	3	2																								2			2													1
10	4	5	2328	168000	3	3	2	7	2																								2			2													2
0	4	1	2329	100000	3	3	2	6	2																								2			2													2
8	4	4	2330	600000	3	3	2	6	2																								2			2													2
0	2	1	2331	48000	3	2	2	6	2																								2			2													2
7	3	2	2332	200000	3	3	2	3	2																								2			2													1
0	2	1	2333	60000	3	3	2	6	2																								2			2													2
0	6	1	2334	50000	3	3	2	6	2																								2			2													2
10	3	5	2335	540000	3	1	1	5	2																								2			2													2
12	6	4	2336	60000	3	1	1	5	2																								2			2													2
0	2	1	2337	48000	3	1	2	6	2																								2			2													2
0	2	1	2338	96000	3	3	2	3	1	2	32				5																	2	2	2				2											1
11	4	5	2339	150000	3	1	2	2	2																								2			2													2
0	2	1	2340	96000	3	1	2	3	2																								2			2													1
0	6	1	2341	120000	3	3	2	2	2																								2			2													2
0	2	1	2342	54000	3	1	2	2	2																								2			2													1
0	5	1	2343	216000	3	1	2	6	2																								2			2													2
0	3	1	2344	96000	3	1	2	3	2																								1		1	2	3												1
0	5	1	2345	60000	3	1	2	2	2																								2			2													2
12	6	5	2346	96000	3	1	1	5	2																								2			2													2
4	2	2	2347	72000	3	1	2	6	2																								2			2													2
10	4	4	2348	480000	3	1	2	1	2																								2			2													1
10	3	5	2349	48000	3	1	2	3	2																								2			2													2
8	5	3	2350	65000	3	3	2	9	2																								2			2													2
5	2	3	2351	96000	3	3	2	6	2																								2			2													2
0	4	1	2352	50000	3	3	1	6	2																								2			2													2
0	2	1	2353	54000	3	1	2	6	2																								2			2													2
0	5	1	2354	48000	2	1	2	6	2																								2			2													2
8	4	3	2401	400000	3	3	2	3	2																								2			2													2
8	1	3	2402	24000	3	3	5	4	2																								2			2													2
15	4	6	2403	84000	3	3	1	5	2																								2			2													2
10	2	4	2404	480000	3	3	2	3	1	2	19						1															1	2	2				2											2
8	5	4	2405	72000	3	3	2	3	1	1	20						12															2	2	1															2
14	2	4	2406	600000	3	3	2	1	2																								2			2													2
5	5	4	2407	48000	3	3	2	6	2																								2			2													2
10	2	4	2408	336000	3	3	2	1	1	2	32						2															1	2	1				2											1
15	3	6	2409	360000	3	3	2	6	2																								2			2													2
6	4	3	2410	72000	3	3	2	3	2																								2			2													2
10	2	5	2411	120000	3	2	2	3	2																								2			2													2
0	2	1	2412	96000	3	2	2	2	1	1	20						10															1	2	2															2
10	2	4	2413	120000	3	3	2	6	2																								2			2													2
12	4	4	2414	120000	3	3	2	3	2																								2			2													2
5	3	4	2415	72000	3	3	1	2	2																								2			2													2
8	4	5	2416	120000	3	3	1	3	2																								2			2													2
17	2	7	2417	48000	3	3	2	6	2																								2			2													2
7	4	3	2418	72000	3	3	2	3	1	1	12						2															1	2	2															1
0	5	1	2419	72000	3	2	2	6	2																								2			2													2
3	5	2	2420	30000	3	3	2	3	2																								2			2													2
2	3	2	2421	108000	3	3	2	2	2																								1		1	2	5												2
14	4	6	2422	720000	3	3	2	3	2																								2			2													2
8	5	4	2423	60000	3	3	2	6	2																								2			2													2
17	5	7	2424	36000	3	3	1	5	2																								2			2													2
15	5	6	2426	180000	3	3	1	3	2																								2			2													2
15	2	6	2427	2400000	3	3	2	6	2																								2			2													2
0	4	1	2428	60000	3	1	2	3	1	1	35						20															1	2	2															1
0	2	1	2429	48000	3	1	2	3	2																								2			2													2
0	2	1	2430	60000	3	1	1	3	2																								2			2													2
2	3	2	2431	108000	3	2	2	2	2																								2			2													2
10	3	5	2432	960000	3	3	1	5	2																								2			2													2
0	2	1	2433	72000	3	1	2	3	2																								2			2													2
7	6	3	2434	72000	3	1	2	6	2																								2			2													2
0	2	1	2435	84000	3	1	2	6	2																								2			2													2
0	2	1	2436	60000	3	1	2	3	2																								2			2													2
6	5	3	2437	108000	3	1	1	3	1	1	20						6															1	2	1															2
0	3	1	2438	72000	3	1	2	6	2																								2			2													2
10	2	5	2439	84000	3	1	2	6	2																								2			2													2
0	5	1	2440	84000	3	1	2	3	2																								1		1	2	3												2
0	5	1	2441	84000	3	1	2	3	1	1	20						5															2	2	2															1
12	4	5	2442	72000	3	1	1	5	2																								2			2													2
0	2	1	2443	60000	3	1	2	3	2																								2			2													2
0	6	1	2444	108000	3	1	2	6	2																								2			2													2
0	2	1	2445	216000	3	1	2	3	2																								2			2													2
5	3	3	2446	240000	3	1	2	6	2																								2			2													2
12	4	5	2447	120000	3	1	1	6	2																								2			2													2
0	1	1	2448	72000	3	1	2	3	2																								2			2													2
0	4	1	2450	80000	3	1	2	3	2															42									1		1	1		1				3							1
0	2	1	2451	108000	3	1	2	6	2																								2			2													2
0	2	1	2452	36000	3	1	2	3	2																								1		1	1	3	2											1
0	3	1	2453	72000	3	1	2	3	2																								2			2													2
10	5	5	2454	60000	3	1	1	5	2																								2			2													2
12	5	5	2501	500000	3	2	2	3	2																								2			2													1
12	5	4	2502	7000	3	2	1	8	2																								2			2													2
5	3	2	2503	10000	3	3	2	3	2																								2			2													2
8	3	4	2504	13000	3	1	2	2	2																								2			2													1
0	5	1	2505	5000	3	2	2	2	2																								1		2	2			2	7777	2	7777	7777	7777	7777				1
7	3	3	2506	50000	3	3	2	6	2																								2			2													2
0	6	1	2507	88	3	3	2	6	2																								2			2													2
0	2	1	2508	7000	3	1	2	3	2																								2			2													1
12	3	4	2509	180000	3	3	2	6	2																								2			2													2
12	3	5	2510	200000	3	3	2	6	2																								2			2													2
0	2	1	2511	8000	3	3	2	6	2																								2			2													2
0	4	1	2512	20000	3	1	2	6	2																								2			2													2
0	4	1	2513	10000	3	3	2	6	2																								2			2													2
0	5	1	2514	60000	3	1	2	6	2																								2			2													2
5	2	2	2515	36000	3	1	1	2	2																								2			2													2
0	5	1	2516	360000	3	1	2	6	2																								2			2													2
0	2	1	2517	60000	3	1	2	6	2																								2			2													2
0	3	1	2518	72000	3	3	2	6	2																								2			2													2
0	2	1	2519	84000	3	3	2	6	2																								2			2													2
0	4	1	2520	60000	3	1	2	2	2																								2			1		1											1
3	2	2	2521	48000	3	1	2	6	2																								2			2													2
12	3	4	2522	48000	3	1	1	5	2																								2			2													2
0	2	1	2523	108000	3	1	2	2	2																								2			2													2
0	3	1	2524	96000	3	1	5	3	1	1	15						12															1	2	2															1
8	4	4	2525	84000	3	1	2	3	2															21									1		1	1		2				10							1
13	4	4	2526	40000	3	1	1	8	2																								2			2													2
6	2	2	2527	108000	3	1	2	2	2																								2			2													2
5	5	3	2528	60000	3	3	2	3	2																								2			2													2
10	4	5	2529	70000	3	3	2	6	2																								2			2													2
0	5	1	2530	300000	3	3	2	3	2																								2			2													1
10	6	5	2531	600000	3	3	2	3	2																								2			2													1
0	4	1	2532	500000	3	3	5	6	2																								2			2													2
10	5	5	2533	360000	3	3	2	6	2																								2			2													2
0	4	1	2534	84000	3	1	2	3	2																								1		1	2	10												1
12	7	5	2535	240000	3	1	2	2	2																								2			2													2
0	3	1	2536	84000	3	1	2	3	2																								2			2													2
0	2	1	2537	48000	3	1	2	3	2																								2			2													2
0	3	1	2538	36000	3	1	2	6	2																								2			2													2
0	4	1	2539	120000	3	1	1	3	2																								2			2													2
0	4	1	2540	40000	3	1	2	3	2																								2			2													2
12	4	5	2541	70000	3	1	1	3	2																								2			2													2
6	5	3	2542	144000	3	1	1	2	2																								2			2													2
0	2	1	2543	108000	3	1	2	6	2																								2			2													2
10	5	5	2544	72000	3	1	2	3	2																								2			2													1
0	4	1	2545	6000	3	1	2	2	2																								2			2													2
0	2	1	2546	5000	3	1	5	2	2																								2			2													1
0	2	1	2547	88	3	1	1	6	2																								2			2													2
0	1	1	2548	60000	3	1	5	2	1	1	22							1														2	2	3															1
0	3	1	2549	6000	3	2	1	2	2																								2			2													2
10	2	5	2550	5000	3	1	2	3	2																								2			2													1
0	1	1	2551	4000	3	1	5	3	2																								2			2													2
0	2	1	2552	48000	3	1	2	6	2																								2			2													2
0	4	1	2553	60000	3	1	2	6	2																								2			2													2
0	4	1	2554	60000	3	1	5	2	2																								2			2													1
5	4	3	2601	108000	3	1	1	2	2																								2			2													1
5	5	3	2602	48000	3	3	2	9	2																								2			2													2
12	2	5	2603	36000	3	3	2	3	2																								2			2													2
6	2	3	2604	30000	3	1	2	2	1	1	25						15															1	2	2															1
10	2	5	2605	84000	3	2	2	6	2																								2			2													2
12	2	5	2606	72000	3	1	2	3	2																								2			2													2
10	2	5	2607	72000	3	3	5	6	2																								2			2													2
0	3	1	2608	72000	2	3	5	6	2																								2			2													2
10	2	5	2610	60000	3	3	2	3	1	1	26				1																	1	1	2	1		1												2
0	2	1	2611	60000	3	1	2	6	2																								2			2													2
13	6	5	2612	84000	3	2	2	2	1	2	21																					2	2	2				2											1
8	2	4	2613	60000	3	1	2	6	2																								2			2													2
10	6	5	2614	120000	3	3	1	3	2																								2			2													1
8	5	4	2615	84000	3	2	2	3	1	1	22						5															2	2	2															2
12	3	5	2616	180000	3	2	1	2	2																								2			2													2
0	2	1	2617	96000	3	1	2	6	2																								2			2													2
0	4	1	2618	120000	3	1	2	3	2																								2			2													2
5	2	3	2619	60000	3	3	2	6	2																								2			2													2
5	3	2	2620	108000	3	2	2	6	2																								2			2													2
10	4	4	2621	60000	3	2	2	3	2																								2			2													2
10	2	5	2622	1200108	3	1	2	8	2																								2			2													1
0	2	1	2623	240000	3	3	2	6	2																								2			2													2
12	2	4	2624	60000	3	3	2	3	2																								2			2													2
5	2	2	2625	120000	3	3	2	6	2																								2			2													2
5	2	2	2626	72000	2	2	1	2	2																								1		1	2						4							2
4	4	2	2627	120000	3	1	2	6	2																								2			2													2
8	5	4	2628	100000	3	3	2	6	2																								2			2													2
12	6	5	2630	120000	3	88	3	6	2																								2			2													2
0	3	1	2631	72000	3	2	2	2	1	2	28				16																	2	2	2				1											1
5	7	3	2632	60000	3	2	2	6	2																								2			2													2
8	3	3	2633	48000	3	2	1	6	2																								2			2													2
14	2	6	2635	240000	3	3	2	6	2																								2			2													2
10	4	5	2636	60000	3	1	1	2	2																								2			2													2
8	3	3	2637	72000	3	1	2	2	2																								2			2													2
10	8	5	2638	600000	3	1	2	3	2																								2			2													2
5	3	3	2639	72000	3	1	1	6	2																								2			2													2
0	3	1	2641	60000	3	3	2	2	1	1	15						24															1	2	1															1
5	5	3	2642	96000	3	3	2	3	2																								2			2													2
18	4	7	2643	360000	3	1	2	6	2																								2			2													2
14	1	6	2644	72000	3	1	2	2	2																								2			2													2
0	3	1	2645	36000	3	3	5	6	2																								2			2													2
0	4	1	2646	120000	3	3	2	6	2																								2			2													2
5	4	3	2647	72000	3	1	2	6	2																								2			2													2
9	6	3	2648	60000	3	1	2	3	2																								2			2													2
16	6	7	2649	180000	3	1	2	1	2																								2			2													1
8	5	3	2650	324000	3	3	2	1	2																								2			2													1
9	9	3	2651	288000	3	2	2	6	2																								2			2													2
0	3	1	2652	12000	3	1	2	6	2																								2			2													2
3	3	2	2653	96000	3	2	1	6	2																								2			2													2
0	3	1	2654	48000	3	2	2	2	1	1	10						10															2	1	1	1		10												2
10	7	4	2701	100000	3	3	2	6	2																								2			2													2
10	2	5	2702	300000	3	3	2	3	2																								2			2													2
0	2	1	2703	88	3	3	2	6	2																								2			2													2
10	4	4	2704	200000	3	3	2	3	2																								2			2													1
5	5	3	2705	150000	3	3	2	3	2																								2			2													1
0	2	1	2707	60000	3	3	2	6	2																								2			2													2
0	3	1	2708	88	3	1	5	6	2																								2			2													2
12	6	5	2709	480000	3	3	1	9	2																								2			2													1
10	4	5	2710	180000	3	3	2	3	2																								2			2													2
5	3	3	2712	20000	3	3	2	6	2																								2			2													2
10	8	5	2713	200000	3	3	1	3	2																								2			2													2
5	4	3	2714	150000	3	3	2	3	2																								2			2													2
12	3	5	2715	250000	3	3	1	1	2																								2			2													2
0	4	1	2716	60000	3	1	2	6	2																								2			2													2
10	3	5	2717	250000	3	3	2	3	2																								2			2													2
0	3	1	2718	48000	3	2	2	6	2																								2			2													2
0	2	1	2719	48000	3	1	2	6	2																								2			2													2
0	3	1	2721	60000	3	2	1	3	2																								2			2													1
0	2	1	2722	60000	3	2	2	2	2																								2			2													1
10	2	5	2723	120000	3	3	2	3	2																								2			2													1
5	3	3	2724	96000	3	3	2	3	2																								2			2													1
0	3	1	2725	36000	3	1	2	6	2																								2			2													2
0	1	1	2726	36000	3	1	5	2	2																								1		1	2	5												1
0	3	1	2727	72000	3	1	2	2	1	1	20						5															2	2	2															1
0	1	1	2729	48000	3	1	2	2	1	1	21						15															1	2	2															1
0	3	1	2730	36000	3	1	2	2	2																								2			2													2
0	4	1	2731	60000	3	1	2	2	2																								1		1	2	5												1
0	3	1	2732	48000	3	1	1	2	2																								2			2													2
0	3	1	2733	60000	3	1	1	2	1	1	18				12																	2	1	2	1		4												1
0	2	1	2734	36000	3	1	2	2	2																								2			2													2
13	19	5	2735	168000	3	1	1	5	2																								2			2													2
0	2	1	2737	120000	3	1	2	6	2																								2			2													2
5	3	2	2738	180000	3	1	2	2	1	2	20					4																2	1	2	1		3	2											1
0	3	1	2739	48000	3	1	2	6	2																								2			2													2
0	4	1	2740	45000	3	1	2	2	1	1	18						10															1	2	2															1
0	6	1	2741	50000	3	1	2	3	2																								1		1	2						10							1
7	3	2	2742	60000	3	1	4	6	2																								2			2													2
5	2	2	2743	120000	3	3	2	6	2																								2			2													2
0	6	1	2744	180000	3	1	2	6	2																								2			2													2
15	3	6	2745	400000	3	3	1	5	2																								2			2													2
0	4	1	2746	180000	3	3	2	6	2																								2			2													2
10	3	5	2747	150000	3	3	2	2	2																								2			2													2
8	7	3	2748	7000	3	3	2	6	2																								2			2													2
5	2	3	2749	24000	3	1	2	6	2																								2			2													2
8	4	3	2750	48000	3	3	2	2	2																								2			2													2
5	3	3	2751	300000	3	1	2	3	2																								2			2													1
10	4	5	2752	80000	3	3	2	6	2																								2			2													2
10	3	5	2753	200000	3	3	2	6	2																								2			2													2
8	5	4	2754	120000	3	3	2	6	2																								2			2													2
10	6	4	2801	300000	3	3	2	3	2																								2			2													2
0	5	1	2802	50000	3	3	1	3	2																								2			2													2
8	2	3	2803	400000	3	3	2	6	2																								2			2													2
0	5	1	2804	200000	3	3	2	3	2																								1		1	2										7			1
0	5	1	2805	200000	3	3	2	3	2																								1		1	2										7			1
0	4	1	2806	60000	3	3	2	6	2																								2			2													2
12	5	5	2807	100000	3	3	2	3	2																								2			2													2
5	5	3	2808	100000	3	3	2	6	2																								2			2													2
17	3	7	2809	150000	3	3	2	6	2																								2			2													2
0	3	1	2810	48000	3	3	2	6	2																								2			2													2
0	4	1	2811	60000	3	1	3	2	1	2	77	10						2														2	1	2	1			1								8		8	2
6	2	3	2813	72000	3	3	5	6	2																								2			2													2
0	4	1	2814	150000	3	3	2	3	2																								1		1	2	3												1
6	3	2	2815	24000	3	1	1	2	2																								1		1	2						10							1
0	4	1	2816	36000	3	1	2	6	2																								2			2													2
0	5	1	2817	300000	3	3	2	3	2																								2			2													2
5	3	3	2818	100000	3	3	2	6	2																								2			2													2
10	4	5	2819	115000	3	3	1	3	2																								2			2													1
10	4	5	2820	84000	3	2	2	3	2																								1		2	2	7777		7777	7777	7777	7777	7777		3				2
12	3	4	2821	120000	3	3	2	3	2																								2			2													1
0	2	1	2822	72000	3	3	2	6	2																								2			2													2
6	3	3	2823	120000	3	3	2	6	2																								2			2													2
0	7	1	2824	96000	3	3	1	3	2																								2			2													1
0	2	1	2825	88	3	3	2	6	2																								2			2													2
0	7	1	2826	50000	3	3	2	6	2																								2			2													2
0	2	1	2827	72000	3	1	2	6	2																								2			2													2
0	3	1	2828	48000	3	1	1	2	2																								2			2													2
0	2	1	2829	60000	3	1	2	6	2																								2			2													2
0	5	1	2830	72000	3	1	3	2	2																								1		1	2	9												1
15	6	7	2831	36000	3	1	2	2	1	1	15						12															1	1	2	1		0												1
10	2	5	2832	40000	3	3	2	3	2																								2			2													2
6	5	5	2833	72000	3	1	1	6	2																								2			2													2
0	3	1	2834	48000	3	1	2	6	2																								2			2													2
7	3	3	2835	60000	3	3	2	3	2																								2			2													1
0	2	1	2836	60000	3	1	2	2	2																								2			2													1
0	4	1	2837	60000	3	3	2	2	2																								2			2													2
2	2	2	2838	21600	3	1	2	2	2																								1		1	2	4												2
0	3	1	2839	36000	3	3	5	6	2																								2			2													2
0	5	1	2840	60000	3	1	2	2	2																								1		1	2	7												2
5	4	5	2841	120000	3	1	1	5	2																								2			2													2
7	6	3	2842	24000	3	1	2	2	2																								1		1	2	6												2
0	5	1	2843	60000	3	1	2	6	2																								2			2													2
0	3	1	2844	48000	3	1	2	2	2																								2			2													2
0	2	1	2845	72000	3	1	88	6	2																								2			2													2
0	2	1	2846	84000	3	1	2	2	1	1	15				5																	2	1	2	1							3							1
0	2	1	2847	88	3	88	88	88	2																								2			2													2
0	2	1	2848	48000	3	1	2	2	1	2	17							2														1	1	2	1		4	2											2
4	2	2	2849	72000	3	1	2	8	2																								2			2													2
12	3	4	2850	88	3	1	1	5	2																								2			2													2
0	2	1	2851	72000	3	1	2	6	2																								2			2													2
0	3	1	2853	48000	3	1	2	6	2																								2			2													2
0	1	1	2854	100000	3	1	2	3	2																								1		1	2						6							1
12	4	5	2901	100000	3	1	1	3	2																								2			2													2
10	3	5	2902	60000	3	1	1	2	2																								2			2													2
12	2	5	2903	300000	3	3	2	1	2																								2			2													2
15	5	6	2904	100000	3	3	1	5	2																								2			2													2
10	5	5	2905	500000	3	3	2	3	2																								2			2													1
12	6	5	2906	400000	3	3	1	8	2																								2			2													2
15	4	6	2907	300000	3	3	1	5	2																								2			2													2
15	5	6	2908	800000	3	3	1	5	2																								2			2													2
12	4	5	2909	100000	3	3	1	5	2																								2			2													2
10	4	5	2910	200000	3	3	2	3	2																								2			2													2
0	2	1	2911	36000	3	1	2	6	2																								2			2													2
0	3	1	2912	36000	3	1	2	9	2																								2			2													2
8	4	4	2913	60000	3	1	1	6	2																								2			2													2
0	3	1	2914	48000	3	1	2	2	2																								2			2													2
6	3	3	2915	36000	3	1	1	2	2																								2			2													2
0	3	1	2916	36000	3	1	2	6	2																								2			2													2
0	3	1	2917	60000	3	1	2	3	2																								1		1	2						5							1
0	3	1	2918	400000	3	3	2	6	2																								2			2													2
8	2	3	2919	480000	3	3	2	6	2																								2			2													2
0	5	1	2920	50000	3	3	2	2	2																								1		1	2	4												1
7	4	2	2921	40000	3	3	2	3	2																								2			2													1
5	3	2	2922	120000	3	3	2	2	2																								2			2													1
5	2	3	2923	50000	3	3	2	5	2																								2			2													2
0	2	1	2924	30000	3	1	2	2	1	1	20						15															1	2	1															1
5	3	2	2925	54000	3	1	1	2	2																								2			2													1
0	3	1	2926	36000	3	2	2	2	2																								2			2													2
5	4	3	2927	120000	3	3	2	6	2																								2			2													2
8	4	3	2928	72000	3	3	2	2	2																								2			2													2
10	3	5	2929	60000	3	3	2	6	2																								2			2													2
8	3	2	2930	3000	3	3	2	6	2																								2			2													2
0	2	1	2931	36000	3	2	2	6	2																								2			2													2
5	2	2	2932	40000	3	3	2	2	2																								2			2													1
5	5	3	2933	120000	3	3	2	6	2																								2			2													2
0	2	1	2935	100000	3	3	2	6	2																								2			2													2
0	5	1	2936	84000	3	3	2	3	2																								1		1	2	0					4							1
10	2	5	2937	50000	3	3	2	6	2																								2			2													2
0	5	1	2938	100000	3	3	5	6	2																								2			2													2
6	5	3	2939	100000	3	3	2	6	2																								2			2													2
0	3	1	2940	30000	3	3	2	3	2																								2			2													2
12	4	5	2941	90000	3	1	2	3	2																								2			2													2
0	5	1	2942	72000	3	1	2	3	2																								2			2													1
0	3	1	2943	216000	3	2	2	2	2																								2			2													2
5	4	3	2944	36000	3	1	2	2	2																								2			2													1
12	3	5	2945	50000	3	3	1	6	2																								2			2													2
12	2	5	2946	36000	3	1	2	2	2																								2			2													2
0	2	1	2947	144000	3	2	2	6	2																								2			2													2
5	3	3	2948	120000	3	1	2	3	2																								2			2													2
0	2	1	2949	18000	3	3	1	6	2																								2			2													2
4	2	2	2950	20000	3	3	2	2	2																								1		1	2	5												1
5	2	3	2951	150000	3	3	2	6	2																								2			2													2
5	2	2	2952	40000	3	3	2	3	2																								2			2													2
12	4	5	2953	200000	3	3	2	6	2																								2			2													2
7	4	3	2954	200000	3	3	2	3	2																								2			2													2
0	2	1	3001	24000	3	88	2	6	2																								2			2													2
0	2	1	3002	24000	3	1	2	2	2																								2			2													2
0	4	1	3003	24000	3	1	2	2	2																								2			2													2
17	2	6	3004	24000	3	1	2	8	2																								2			2													2
0	3	1	3005	24000	3	1	5	2	2																								2			2													2
5	2	3	3006	18000	3	1	2	3	1	2	22						10															2	2	2				1											1
8	2	5	3007	14400	3	1	2	2	2																								2			2													2
0	5	1	3008	60000	3	1	2	3	2																								2			2													2
5	4	3	3009	60000	3	1	2	3	2																								2			2													1
12	2	5	3010	36000	3	1	2	2	2																								2			2													2
5	4	3	3011	48000	3	1	2	3	2																								2			2													2
0	2	1	3012	72000	3	1	4	3	2																								1		1	2	5												2
0	3	1	3013	72000	3	1	2	6	2																								2			2													2
0	4	1	3014	60000	3	3	2	2	2																								2			2													2
0	1	1	3015	48000	3	3	2	6	2																								2			2													2
0	4	1	3016	30000	3	3	2	6	2																								2			2													2
0	2	1	3017	48000	3	2	2	6	2																								2			2													2
0	4	1	3018	24000	3	2	2	2	2																								1		1	2	5												1
0	1	1	3019	88	3	3	1	2	2																								2			2													1
12	3	4	3020	40000	3	2	1	5	2																								2			2													2
5	2	2	3021	84000	3	1	2	6	2																								2			2													2
8	2	3	3022	60000	3	2	2	2	2																								2			2													2
0	2	1	3023	36000	3	1	2	3	2																								2			2													2
8	4	4	3024	120000	3	1	2	2	2																								1		1	2	15												2
5	4	3	3025	84000	3	1	2	3	2																								1		2	2	7777		7777	7777	7777	7777	7777	7777	7777				2
5	2	3	3026	60000	3	1	2	3	2																								2			2													2
0	4	1	3027	60000	3	3	2	2	2																								2			2													2
0	3	1	3028	72000	3	1	2	6	2																								2			2													2
0	2	1	3029	36000	3	1	5	6	2																								2			2													2
0	5	1	3030	20000	3	1	2	2	2																								2			2													2
5	4	3	3031	36000	3	1	2	2	2																								2			2													2
5	4	3	3032	200000	3	3	2	8	2																								2			2													2
8	3	3	3033	120000	3	3	2	6	2																								2			2													2
15	3	4	3034	54000	3	2	2	2	2																								1		1	2	10												2
0	2	1	3035	60000	3	1	2	6	2																								2			2													2
0	2	1	3036	36000	3	1	2	6	2																								2			2													2
0	2	1	3037	54000	3	1	2	6	2																								2			2													2
0	4	1	3038	60000	3	3	2	3	2																								2			2													1
10	2	5	3039	36000	3	1	2	6	2																								2			2													2
0	4	1	3040	36000	3	1	2	3	2																								2			2													1
5	2	3	3041	30000	3	1	2	3	2																								2			2													2
0	5	1	3042	48000	3	1	2	3	2																								2			2													1
0	2	1	3043	108000	3	1	2	6	2																								2			2													2
6	3	3	3044	48000	3	1	2	3	2																								2			2													2
8	3	5	3045	84000	3	1	1	2	2																								2			2													2
0	2	1	3046	72000	3	1	2	3	2																								2			2													1
0	2	1	3047	84000	3	1	2	6	2																								2			2													2
12	2	4	3048	360000	3	1	2	2	2																								1		1	2	10												2
0	3	1	3049	60000	3	1	2	6	2																								2			2													2
19	6	7	3050	436000	3	3	2	1	2																								2			2													2
13	4	6	3051	324000	3	3	2	2	2																								2			2													2
5	4	3	3052	100000	3	3	2	6	2																								2			2													2
13	6	4	3053	100000	3	3	1	5	2																								2			2													2
0	3	1	3054	40000	3	3	2	3	2																								2			2													1
15	4	6	3101	400000	3	3	1	8	2																								2			2													2
3	3	2	3102	120000	3	3	2	6	2																								2			2													2
0	5	1	3103	60000	3	1	2	6	2																								2			2													2
5	4	3	3104	120000	3	3	2	2	2																								1		1	2						10							1
0	2	1	3105	24000	3	3	88	6	2																								2			2													2
5	4	3	3106	60000	3	3	2	6	2																								2			2													2
0	2	1	3107	24000	3	3	2	6	2																								2			2													2
13	5	4	3108	144000	3	1	1	5	2																								2			2													2
10	5	4	3109	96000	3	2	2	6	2																								2			2													2
0	3	1	3110	24000	3	1	2	6	2																								2			2													2
8	4	4	3111	60000	3	3	2	2	2																								2			2													2
6	4	3	3112	120000	3	3	2	6	2																								2			2													2
7	2	4	3113	72000	3	1	2	6	2																								2			2													2
10	3	5	3114	180000	3	3	2	2	2																								2			2													1
5	2	3	3115	60000	3	2	2	6	2																								2			2													2
13	3	3	3116	60000	3	2	1	5	2																								2			2													2
0	2	1	3117	60000	3	1	2	6	2																								2			2													2
0	5	1	3118	24000	3	1	2	6	2																								2			2													2
0	3	1	3119	36000	3	1	2	6	2																								2			2													2
4	2	2	3120	144000	3	1	2	3	2																								1		1	2						10							1
0	2	1	3121	60000	3	1	2	6	2																								2			2													2
4	3	2	3122	60000	3	1	2	3	1	1	18				10		20															1	1	1	1							2							1
0	5	1	3123	108000	3	1	2	6	2																								2			2													2
0	2	1	3124	84000	3	1	2	3	1	1	24						12															1	2	2															1
0	6	1	3125	48000	3	1	2	6	2																								2			2													2
0	4	1	3126	36000	3	1	1	3	2																								2			2													2
0	3	1	3127	88	3	1	2	3	2																								2			2													1
0	1	1	3128	14400	3	1	5	1	2																								2			2													2
0	3	1	3129	24000	3	1	2	6	2																								2			2													2
0	2	1	3130	36000	3	1	2	3	2																								2			2													1
10	4	5	3131	144000	3	1	1	3	2																								2			2													2
0	4	1	3132	96000	3	1	2	3	2																								2			2													2
3	3	2	3133	180000	3	1	1	2	1	1	18				2		1															2	1	2	2				2	7777	7777	7777	7777	7777	7777				1
0	5	1	3134	180000	3	1	1	6	2																								2			2													2
0	3	1	3135	120000	3	1	1	3	1	1	18					3																1	2	2															1
0	3	1	3137	84000	3	3	2	3	2																								2			2													2
0	5	1	3138	48000	3	1	2	3	2																								2			2													2
5	2	2	3139	60000	3	1	2	6	2																								2			2													2
3	3	2	3140	48000	3	1	2	6	2																								2			2													2
15	4	6	3141	84000	3	1	1	5	2																								2			2													2
0	2	1	3142	12000	3	1	2	3	2																								1		2	2			28	7777	7777	7777	7777	7777	7777				1
12	3	5	3143	48000	3	1	1	3	2																								2			2													2
0	6	1	3144	54000	3	1	2	2	2																								2			2													2
0	6	1	3145	84000	3	1	1	2	1	2	14							2														1	2	2				2											2
5	2	2	3146	36000	3	3	2	2	2																								2			2													2
12	4	5	3147	48000	3	3	2	6	2																								2			2													2
0	3	1	3149	36000	3	2	2	6	2																								2			2													2
12	6	4	3150	36000	3	2	2	6	2																								2			2													2
0	6	1	3151	24000	3	3	2	2	2																								2			2													2
0	1	1	3152	36000	3	1	5	8	2																								2			2													2
4	7	2	3153	120000	3	1	2	2	2																								2			2													1
5	3	3	3154	36000	3	1	1	3	2																								2			2													2
0	1	1	3201	96000	3	1	5	6	2																								2			2													2
0	2	1	3203	48000	3	1	2	3	2																								2			2													2
0	2	1	3203	48000	3	1	2	3	2																								2			2													2
9	2	4	3204	23000	3	1	2	2	2																								2			2													2
0	2	1	3205	48000	3	1	2	6	2																								2			2													2
5	2	3	3206	84000	3	1	2	3	2																								2			2													2
0	2	1	3207	42000	3	1	2	6	2																								2			2													2
5	6	3	3208	108000	3	1	1	3	2																								1		1	2										7			1
5	2	3	3209	84000	3	1	2	6	2																								2			2													2
8	2	4	3210	48000	3	3	2	3	1	2	30						4															1	2	3				2											2
0	2	1	3211	36000	3	1	2	6	2																								2			2													2
8	5	4	3212	72000	3	1	1	3	2																								2			2													2
0	2	1	3213	48000	3	1	2	6	2																								2			2													2
0	4	1	3214	90000	3	1	2	3	2																								2			2													2
0	2	1	3215	12000	3	1	5	6	2																								2			2													2
2	3	2	3216	96000	3	1	2	6	2																								2			2													2
4	3	2	3217	120000	3	1	2	1	2																								2			2													2
0	3	1	3218	48000	3	1	2	7	2																								2			2													2
0	5	1	3219	96000	3	1	2	6	2																								2			2													2
0	3	1	3220	36000	3	1	2	6	2																								2			2													2
5	4	3	3221	50000	3	1	2	2	2																								2			2													2
0	4	1	3222	96000	3	1	2	6	2																								2			2													2
0	2	1	3223	180000	3	1	2	2	2																								2			2													2
12	2	6	3224	36000	3	1	2	2	2																								2			2													2
0	2	1	3225	108000	3	1	2	7	2																								2			2													2
0	3	1	3226	54000	3	1	2	2	2																								2			2													2
0	2	1	3227	54000	3	1	5	2	2																								2			2													2
10	4	5	3228	36000	3	1	88	3	2																								2			2													2
5	2	3	3229	72000	3	1	2	6	2																								2			2													2
10	4	5	3230	24000	3	1	88	2	2																								2			2													2
0	3	1	3231	36000	3	1	2	3	2																								2			2													2
14	5	5	3232	24000	3	1	1	5	2																								2			2													2
5	8	3	3233	96000	3	1	2	6	2																								2			2													2
0	5	1	3235	48000	3	1	88	2	2																								2			2													2
5	6	3	3236	36000	3	3	2	6	2																								2			2													2
0	2	1	3238	480000	3	1	2	88	2																								2			2													2
0	2	1	3239	36000	3	1	2	6	2																								2			2													2
10	6	5	3241	360000	3	1	2	2	1	2	25							2														2	1	1	1		2	1											1
0	2	1	3243	60000	3	1	2	6	2																								2			2													2
0	3	1	3245	72000	3	1	2	2	2																								2			2													2
5	3	3	3246	36000	3	1	2	6	2																								2			2													2
8	4	4	3247	120000	3	1	2	6	2																								2			2													2
0	3	1	3248	84000	3	1	2	2	2																								2			2													2
0	2	1	3249	72000	3	1	2	6	2																								2			2													2
0	3	1	3250	60000	3	1	2	6	2																								2			2													2
0	6	1	3251	300000	3	1	2	2	2																								1		1	2	10												1
0	4	1	3252	108000	3	1	2	6	2																								2			2													2
0	2	1	3253	144000	3	1	2	2	2																								2			2													2
11	5	4	3254	120000	3	1	1	5	2																								2			2													2
12	4	5	3301	100000	3	3	1	2	2																								2			2													2
1	5	1	3302	240000	3	1	2	6	2																								2			2													2
5	2	3	3303	96000	3	3	2	6	2																								2			2													2
10	5	5	3304	120000	3	3	2	3	2																								2			2													2
10	5	5	3305	48000	3	3	2	2	2																								2			2													2
10	3	5	3306	100000	3	3	1	5	2																								2			2													2
0	5	1	3307	36000	3	3	2	6	2																								2			2													2
10	2	5	3308	120000	3	3	2	2	2																								2			2													2
10	3	5	3309	120000	3	3	2	6	2																								2			2													2
7	6	3	3311	88	3	3	2	3	2																								1		1	2								3					1
10	3	5	3313	120000	3	1	2	6	2																								2			2													2
10	2	5	3314	60000	3	2	2	3	2																								2			2													1
16	4	6	3315	180000	3	2	1	5	2																								2			2													1
12	4	5	3316	96000	3	3	1	2	2																								2			2													2
10	3	5	3317	96000	3	3	2	3	2																								2			2													2
7	2	3	3318	100000	3	2	2	3	2																								1		2	2	7777		7777	7777	7777		3	7777	7777				2
12	3	5	3319	60000	3	3	2	1	2																								2			2													2
0	5	1	3320	60000	3	2	2	3	2																								2			2													2
10	3	5	3321	240000	3	3	2	3	2																								2			2													1
17	4	6	3322	120000	3	3	1	3	2																								2			2													2
12	2	5	3323	300000	3	3	2	1	2																								2			2													2
16	3	6	3324	120000	3	2	2	3	2																								2			2													2
10	2	4	3325	60000	3	3	2	6	2																								2			2													2
10	3	4	3326	120000	3	88	2	6	2																								2			2													2
15	4	6	3327	48000	3	2	1	5	2																								2			2													2
12	2	4	3328	100000	3	3	2	3	2																								2			2													2
0	2	1	3329	36000	3	1	2	2	2																								2			2													2
6	4	3	3330	50000	3	3	2	3	2																								2			2													1
0	2	1	3331	48000	3	3	2	6	2																								2			2													2
10	7	5	3332	96000	3	1	1	5	2																								2			2													2
12	6	4	3333	192000	3	2	1	2	2																								2			2													1
2	3	2	3334	30000	3	2	2	3	2																								1		1	2	4												1
13	5	4	3335	120000	3	2	2	3	2																								2			2													1
8	2	4	3336	36000	3	2	2	3	1	2	32				2																	1	2	2				2											1
0	4	1	3337	24000	3	1	2	6	2																								2			2													2
0	3	1	3338	60000	3	3	5	9	2																								2			2													2
10	3	5	3339	120000	3	2	2	6	2																								2			2													2
8	5	3	3340	60000	3	2	5	3	2																								2			2													2
12	4	5	3341	60000	3	3	1	5	2																								2			2													2
4	2	2	3342	84000	3	2	2	3	2																								1		1	2						5							1
10	2	5	3343	100000	3	2	2	6	2																								2			2													2
0	5	1	3344	36000	3	3	2	6	2																								2			2													2
11	3	5	3345	48000	3	3	1	5	2																								2			2													1
8	5	3	3346	180000	3	2	2	3	2																								2			2													1
0	2	1	3347	180000	3	3	5	6	2																								2			2													2
10	3	4	3348	72000	3	3	1	8	2																								2			2													2
0	2	1	3349	102000	3	1	2	6	2																								2			2													2
6	4	3	3350	240000	3	1	2	3	2																								2			2													2
10	3	5	3351	100000	3	3	2	3	2																								2			2													2
7	6	3	3352	180000	3	3	2	3	2																								2			2													2
5	2	3	3353	50000	3	2	2	6	2																								2			2													2
8	2	3	3354	48000	3	3	2	3	2																								1		1	2	4												1
10	4	5	3401	500000	3	3	1	3	2																								2			2													1
10	4	5	3402	120000	3	3	1	3	2																								2			2													1
12	2	5	3403	120000	3	3	1	6	2																								2			2													2
12	2	5	3404	20000	3	3	1	6	2																								2			2													2
5	3	3	3405	100000	3	3	2	6	2																								2			2													2
13	3	6	3406	200000	3	3	1	5	2																								2			2													2
12	4	5	3407	10000	3	3	2	6	2																								2			2													2
15	2	6	3408	20000	3	3	2	3	2																								2			2													1
12	2	5	3409	40000	3	3	2	6	2																								2			2													2
0	4	1	3410	100000	3	3	2	3	2																								2			2													1
10	4	5	3411	60000	3	3	2	2	2																								2			2													2
10	3	5	3412	300000	3	3	2	6	2																								2			2													2
5	3	2	3413	40000	3	3	2	6	2																								2			2													2
5	1	3	3414	100000	3	3	5	6	2																								2			2													2
5	1	2	3415	120000	3	3	5	3	2																								2			2													2
10	3	5	3417	120000	3	3	2	7	2																								2			2													1
0	2	1	3418	36000	3	2	2	3	2																								2			2													1
0	5	1	3420	120000	3	3	2	7	2																								1		2	2	7777		7777	7777	7777		3	7777	7777				1
0	2	1	3421	180000	3	3	2	8	2																								2			2													2
5	3	3	3422	100000	3	3	1	3	2																								2			2													2
16	4	6	3423	150000	3	3	1	5	2																								2			2													2
5	4	3	3424	75000	3	3	2	3	2																								2			2													1
15	6	6	3425	800000	3	3	2	6	2																								2			2													2
5	8	3	3426	300000	3	3	2	6	2																								2			2													2
17	2	6	3427	120000	3	3	2	7	2																								2			2													2
10	1	5	3428	88	3	3	2	3	2																								2			2													2
10	5	5	3430	200000	3	3	2	7	1	1	25				10																	2	2	2															2
12	5	4	3431	100000	3	3	1	8	2																								2			2													2
5	2	2	3433	100000	3	3	2	6	2																								2			2													2
0	2	1	3434	70000	3	3	2	6	2																								2			2													2
0	3	1	3435	4800000	3	3	5	6	2																								2			2													2
10	3	4	3436	150000	3	3	2	6	2																								2			2													2
8	5	3	3437	100000	3	3	2	6	2																								2			2													2
10	2	5	3438	360000	3	3	2	6	2																								2			2													2
8	2	2	3439	600000	3	3	2	6	2																								2			2													2
10	4	5	3440	20000	3	3	2	3	2																								2			2													2
0	6	1	3441	120000	3	3	2	2	2																								2			2													1
0	3	1	3442	600000	3	3	2	6	2																								2			2													2
16	4	6	3443	240000	3	3	1	3	2																								2			2													2
6	2	3	3444	24000	3	3	2	3	2																								2			2													2
5	2	3	3445	70000	3	3	2	6	2																								2			2													2
10	2	5	3446	120000	3	3	5	3	2																								2			2													2
5	3	3	3447	70000	3	3	2	2	2																								2			2													1
5	4	3	3448	120000	3	3	2	3	2																								2			2													2
12	3	5	3449	60000	3	3	2	3	2																								2			2													2
15	9	6	3450	120000	3	3	2	4	2																								2			2													2
12	5	5	3451	180000	3	3	2	3	2																								2			2													2
5	4	3	3452	120000	3	3	2	6	2																								2			2													2
18	2	7	3453	120000	3	3	1	6	2																								2			2													2
0	8	1	3454	88	3	3	2	6	2																								2			2													2
14	4	6	3501	540000	3	3	1	5	2																								2			2													2
5	5	3	3502	30000	3	1	4	6	2																								2			2													2
0	3	1	3503	60000	3	1	2	5	2																								2			2													2
10	3	5	3504	100000	3	3	2	3	2																								2			2													2
22	4	5	3505	168000	3	3	1	2	2																								2			2													2
0	3	1	3507	3600	3	2	2	2	2																								1		2	2			6	7777	6	7777	7777	7777	7777				1
0	2	1	3508	24000	3	1	5	6	2																								2			2													2
0	3	1	3509	36000	3	1	2	6	2																								2			2													2
0	3	1	3511	36000	3	1	2	6	2																								2			2													2
7	2	3	3512	72000	3	1	2	2	1	2	17					2																1	2	2				2											1
10	4	5	3513	88	3	2	2	6	2																								2			2													2
0	6	1	3514	60000	3	1	1	3	2																								2			2													1
10	6	5	3515	360000	3	1	3	1	2																								2			2													2
0	2	1	3516	36000	3	3	2	3	2																								1		1	2	6												1
10	5	5	3517	84000	3	1	2	1	2																								2			2													2
9	2	4	3518	96000	3	1	2	3	2																								2			2													1
12	4	5	3519	60000	3	2	1	5	2																								2			2													2
0	2	1	3520	36000	3	2	5	6	2																								2			2													2
15	4	6	3521	72000	3	2	1	8	2																								2			2													2
0	4	1	3522	84000	3	3	2	3	2																								2			2													2
12	4	5	3523	84000	3	3	1	8	2																								2			2													2
7	4	3	3524	200000	3	3	2	3	2																								2			2													2
14	2	5	3525	96000	3	3	2	6	2																								2			2													2
12	5	4	3526	96000	3	3	1	3	2																								2			2													2
0	1	1	3527	60000	3	1	5	6	2																								2			2													2
8	3	3	3528	96000	3	1	1	2	2																								2			2													2
4	2	2	3529	36000	3	1	2	6	2																								2			2													2
0	4	1	3530	120000	3	1	2	3	2																								2			2													2
7	4	3	3531	120000	3	1	1	2	2																								1		2	2													1
0	2	1	3532	60000	3	1	2	2	2																								1		2	2													1
5	2	3	3533	36000	3	1	2	6	2																								2			2													2
0	6	1	3534	72000	3	1	1	3	1	1	14																					2	2	2				1											2
0	2	1	3535	60000	3	1	5	6	2																								2			2													2
14	6	5	3536	84000	3	3	1	5	2																								2			2													2
10	3	5	3537	48000	3	3	2	2	1	1	23				5									27								1	2	2				1											1
12	3	5	3538	60000	3	3	1	5	2																								2			2													1
8	4	4	3539	360000	3	2	2	3	2																								2			2													2
8	4	4	3540	100000	3	1	2	3	2																								2			2													1
6	4	3	3541	96000	3	1	3	2	2																								1		1	2	3												1
3	2	2	3542	48000	3	1	2	3	2																								1		2	2	7777		7777	7777	7777		21	7777	7777				1
0	2	1	3543	60000	3	1	2	6	2																								2			2													2
6	4	3	3544	84000	3	3	2	3	2																								2			2													1
12	4	5	3545	240000	3	1	1	2	2																								2			2													1
10	4	5	3546	48000	3	3	2	8	2																								2			2													2
0	3	1	3547	60000	3	1	2	3	2																								2			2													1
12	3	5	3548	36000	3	3	1	3	2																								2			2													2
5	2	3	3549	120000	3	2	2	8	2																								2			2													2
0	3	1	3550	96000	3	3	5	6	2																								2			2													2
0	6	1	3551	180000	3	2	2	6	2																								2			2													2
2	3	2	3552	240000	3	1	2	8	2																								2			2													2
0	4	1	3553	36000	3	1	2	6	2																								2			2													2
10	5	5	3554	36000	3	2	2	3	2																								2			2													2
4	3	2	3601	60000	3	3	2	6	2																								2			2													2
12	5	6	3602	96000	3	1	1	3	2																								2			2													2
8	6	5	3603	360000	3	2	2	3	2																								2			2													1
0	7	1	3604	120000	3	1	2	2	2																								2			2													2
5	4	2	3605	60000	3	88	2	3	2																								2			2													2
6	2	5	3606	12000	3	1	2	2	2																								2			2													2
0	2	1	3607	144000	3	1	2	3	2																								2			2													2
0	2	1	3608	84000	3	1	2	2	2																								1		2	2													1
10	6	4	3609	240000	3	3	2	4	1	1	20				10																	1	2	1															1
12	6	4	3610	120000	3	2	1	6	2																								2			2													2
10	2	5	3611	150000	3	3	2	6	2																								2			2													2
0	2	1	3612	120000	3	3	2	3	2																								2			2													2
7	4	3	3613	120000	3	3	2	6	2																								2			2													2
6	2	3	3614	120000	3	2	2	3	1	2	77	77	77	77																		2	2																1
7	2	5	3615	180000	3	2	2	6	2																								2			2													2
5	3	3	3616	180000	3	2	2	6	2																								2			2													2
10	2	5	3617	100000	3	3	2	6	2																								2			2													2
10	6	5	3618	200000	3	3	2	3	2																								2			2													1
10	5	4	3619	88	3	3	2	6	2																								2			2													2
0	4	1	3620	800000	3	3	1	3	2																								2			2													2
0	2	1	3621	48000	3	2	2	6	2																								2			2													2
0	4	1	3622	100000	3	3	5	6	2																								2			2													2
5	6	3	3623	60000	3	2	2	2	2															77									1		2	1		2											1
10	5	5	3624	120000	3	1	1	8	2																								2			2													2
8	4	3	3625	88	3	1	2	2	2																								1		2	2													1
12	3	4	3626	120000	3	2	2	6	2																								2			2													2
8	2	5	3627	180000	3	2	2	88	2																								2			2													2
8	5	5	3628	144000	3	3	2	6	2																								2			2													2
8	4	3	3629	96000	3	1	1	5	2																								2			2													2
10	3	4	3631	200000	3	2	2	3	2																								2			2													2
6	5	3	3632	156000	3	1	1	3	2																								2			2													2
5	4	3	3633	84000	3	2	2	6	2																								2			2													2
0	4	1	3634	84000	3	1	2	2	2																								2			2													2
0	5	1	3635	96000	3	1	2	3	1	1	20				11																	1	1	2	1		1	1											1
15	4	6	3636	100000	3	3	1	5	2																								2			2													2
6	4	3	3637	100000	3	3	2	6	2																								2			2													2
0	2	1	3639	36000	3	2	5	6	2																								2			2													2
0	3	1	3640	72000	3	3	2	6	2																								2			2													2
18	3	7	3641	600000	3	3	2	1	2																								2			2													1
4	3	2	3642	96000	3	3	2	6	2																								2			2													2
12	2	4	3644	300000	3	3	2	1	2																								2			2													1
10	4	4	3645	50000	3	1	2	2	2																								2			2													2
4	3	2	3646	60000	3	2	2	6	2																								2			2													2
8	4	5	3647	120000	3	3	2	6	2																								2			2													2
10	2	5	3648	420000	3	3	1	5	2																								2			2													1
12	4	4	3649	120000	3	2	1	2	2																								2			2													2
0	2	1	3650	60000	3	2	1	3	2																								2			2													2
14	4	6	3651	100000	3	3	2	2	2																								2			2													2
0	4	1	3652	120000	3	3	88	6	2																								2			2													2
14	2	5	3653	300000	3	3	2	2	2																								2			2													2
12	4	4	3654	60000	3	3	2	3	2																								2			2													2
5	3	3	3702	48000	3	1	2	2	2																								2			2													2
0	5	1	3703	60000	3	1	2	6	2																								2			2													2
7	3	3	3704	108000	3	3	2	3	2																								2			2													2
10	6	4	3705	200000	3	3	2	6	2																								2			2													2
12	6	5	3706	100000	3	3	1	5	2																								2			2													2
3	6	2	3707	120000	3	1	2	1	1	1	20				1																	1	2	2															1
12	4	5	3708	120000	3	2	2	2	2																								2			2													2
0	6	1	3709	48000	3	1	2	6	2																								2			2													2
0	2	1	3710	84000	3	1	2	3	2																								1		1	2						7							1
12	4	5	3711	60000	3	1	1	5	2																								2			2													2
5	3	3	3712	84000	3	2	5	6	2																								2			2													2
8	9	3	3713	200000	3	1	2	3	2																								2			2													1
0	6	1	3714	60000	3	1	2	9	2																								2			2													2
8	8	3	3715	60000	3	2	3	6	2																								2			2													2
8	2	4	3716	100000	3	3	2	3	2																								2			2													1
0	2	1	3717	60000	3	1	2	7	2																								2			2													2
0	6	1	3718	60000	3	1	2	2	1	1	15						5															1	1	1	1							4							1
0	2	1	3719	24000	3	1	2	6	2																								2			2													2
5	2	2	3720	60000	3	1	2	2	1	1	15																					1	1	2	1		12												2
13	4	5	3721	120000	3	3	2	2	2																								2			2													2
10	2	5	3722	180000	3	1	2	1	2																								2			2													2
5	3	3	3723	50000	3	1	2	6	2																								2			2													2
0	3	1	3724	115000	3	3	5	3	2																								1		2	2	7777		7777	7777	7777		2	7777	7777				1
13	4	6	3725	500000	3	3	1	5	2																								2			2													2
12	6	5	3726	650000	3	3	2	6	2																								2			2													2
12	5	4	3727	60000	3	88	88	3	2																								2			2													2
0	4	1	3728	72000	3	1	2	3	2																								1		2	2	7777		7777	7777	7777		3	7777	7777				1
13	5	5	3729	200000	3	3	1	5	2																								2			2													2
0	2	1	3730	48000	3	1	2	2	1	1	16						11															2	2	2															2
8	3	3	3731	72000	3	1	88	2	2																								2			2													1
0	2	1	3732	88	3	1	2	3	2																								2			2													2
5	6	2	3733	84000	3	1	1	2	1	1	16						4															2	2	2															1
0	1	1	3735	88	3	1	2	6	2																								2			2													2
7	5	2	3736	48000	3	1	2	2	1	1	18					1																2	2	2															2
12	4	5	3737	50000	3	1	1	5	2																								2			2													2
5	1	2	3738	12000	3	1	3	2	2																								2			2													2
0	6	1	3739	84000	3	1	2	2	1	2	77	2						3														2	2	2				2											1
10	2	5	3740	72000	3	1	2	2	2																								1		1	2	5												1
4	3	2	3741	72000	3	1	2	3	1	1	20						3															1	2	2															1
7	6	2	3743	72000	3	1	2	3	2																								1		1	2	4												1
10	3	5	3744	36000	3	1	2	3	2																								2			2													1
10	4	5	3745	72000	3	1	2	3	2																								2			2													2
7	2	3	3746	36000	3	2	2	3	2																								1		2	2	7777		7777	7777	7777	7777	7777	7777	7777				2
0	5	1	3748	84000	3	2	2	6	2																								2			2													2
0	4	1	3750	36000	3	1	2	2	2																								2			2													1
10	4	5	3751	96000	3	3	2	3	2																								2			2													2
10	3	5	3752	180000	3	3	1	2	2																								2			2													2
10	2	4	3753	84000	3	3	1	6	2																								2			2													2
8	5	5	3754	60000	3	3	2	6	2																								2			2													2
0	2	1	3801	60000	3	3	2	6	2																								2			2													2
10	2	5	3802	180000	3	1	2	3	1	1	77	77	77	77		2																2	2	2															1
17	4	7	3803	180000	3	1	1	2	2																								2			2													2
10	3	5	3804	120000	3	2	2	3	2																								2			2													2
8	5	3	3805	80000	3	3	2	3	2																								2			2													2
2	2	5	3806	100000	3	3	2	3	2																								2			2													1
10	2	5	3807	180000	3	2	2	2	2																								2			2													2
10	2	5	3808	12000	3	2	2	3	2																								2			2													2
12	2	4	3809	72000	3	1	1	6	2																								2			2													2
10	2	5	3810	144000	3	3	2	7	2																								2			2													2
10	2	5	3811	12000	3	1	2	6	2																								2			2													2
12	2	4	3812	100000	3	3	2	2	2																								2			2													1
10	3	5	3813	60000	3	3	2	6	2																								2			2													2
5	2	3	3814	84000	3	3	2	3	2																								1		1	2	8												1
8	4	3	3815	840000	3	3	2	3	2																								2			2													1
0	1	1	3817	60000	3	1	2	6	2																								2			2													2
8	2	3	3818	12000000	3	3	2	2	2																								2			2													1
8	2	3	3819	60000	3	1	2	2	2																								2			2													2
7	4	3	3820	100000	3	1	2	2	2																								2			2													1
8	1	3	3821	60000	3	1	2	2	2																								2			2													2
8	7	3	3822	180000	3	1	2	6	2																								2			2													2
12	4	4	3823	84000	3	3	1	6	2																								2			2													2
0	5	1	3824	120000	3	1	1	6	2																								2			2													2
0	4	1	3825	100000	3	3	2	2	2																								2			2													2
15	3	6	3826	100000	3	3	2	6	2																								2			2													2
8	5	3	3827	180000	3	3	1	3	2																								2			2													2
15	5	6	3828	200000	3	3	1	6	2																								2			2													2
10	4	5	3829	60000	3	3	1	3	2																								2			2													2
10	4	5	3830	100000	3	3	2	3	2																								2			2													2
0	2	1	3832	88	3	3	2	3	2																								2			2													2
0	4	1	3833	84000	3	3	2	6	2																								2			2													2
7	2	3	3834	88	3	1	2	2	2																								2			2													2
10	4	5	3835	120000	3	1	1	3	2																								2			2													2
10	1	5	3836	120000	3	1	2	6	2																								2			2													2
0	2	1	3837	12000	2	1	2	6	2																								2			2													2
10	5	5	3838	180000	3	1	2	6	2																								2			2													2
0	5	1	3839	88	3	1	2	6	2																								2			2													2
5	2	3	3840	72000	3	1	2	2	1	1	17						3															1	2	2															1
0	3	1	3841	100000	3	1	2	2	1	1	15						7															2	2	2															2
0	4	1	3842	60000	3	3	2	6	2																								2			2													2
5	3	3	3843	88	3	3	2	6	2																								2			2													2
8	2	3	3844	96000	3	1	2	2	2																								2			2													2
10	4	5	3845	60000	3	1	1	3	2																								2			2													1
5	3	3	3846	480000	3	1	2	6	2																								2			2													2
5	2	3	3847	72000	3	1	2	6	2																								2			2													2
5	5	3	3848	100000	3	3	5	6	2																								2			2													2
5	3	3	3849	72000	3	3	2	6	2																								2			2													2
2	5	2	3850	100000	3	3	2	3	2																								2			2													1
9	3	3	3851	10000	3	3	2	3	2																								2			2													1
0	3	1	3853	6000	3	2	2	3	2																								2			2													2
7	2	3	3854	72000	3	3	2	3	2																								2			2													2
9	9	4	3901	120000	3	1	2	6	2																								2			2													2
0	2	1	3902	36000	3	1	1	3	1	1	20						15															2	2	1															2
7	1	3	3903	60000	3	1	4	6	2																								2			2													2
[truncated: 3,128 more rows]
[truncated: 201 more columns]
